# Supplementary material for: State-level variation in opioid prescribing after knee arthroscopy among the opioid-naïve in the USA: 2015–2019
Source: PubMed Central journal article supplement — BMJ Open. 2020 Aug 20;10(8):e035126. doi: 10.1136/bmjopen-2019-035126 (PMC7440827; doi:10.1136/bmjopen-2019-035126), 2020-08-20
Supplement: bmjopen-2019-035126.draft_revisions.pdf [file bmjopen-2019-035126.draft_revisions.pdf]

# BMJ Open

BMJ Open is committed to open peer review. As part of this commitment we make the peer review history of every article we publish publicly available.

When an article is published we post the peer reviewers' comments and the authors' responses online. We also post the versions of the paper that were used during peer review. These are the versions that the peer review comments apply to.

The versions of the paper that follow are the versions that were submitted during the peer review process. They are not the versions of record or the final published versions. They should not be cited or distributed as the published version of this manuscript.

BMJ Open is an open access journal and the full, final, typeset and author-corrected version of record of the manuscript is available on our site with no access controls, subscription charges or pay-per-view fees (<http://bmjopen.bmj.com>).

If you have any questions on BMJ Open's open peer review process please email [info.bmjopen@bmj.com](mailto:info.bmjopen@bmj.com)

# BMJ Open

## State Level Variation in Opioid Prescribing after Knee Arthroscopy among the Opioid-Naïve in the United States: 2012-2015

|                               |                                                                                                                                                         |
|-------------------------------|---------------------------------------------------------------------------------------------------------------------------------------------------------|
| Journal:                      | <i>BMJ Open</i>                                                                                                                                         |
| Manuscript ID                 | bmjopen-2019-035126                                                                                                                                     |
| Article Type:                 | Original research                                                                                                                                       |
| Date Submitted by the Author: | 23-Dec-2019                                                                                                                                             |
| Complete List of Authors:     | Ukert, Benjamin; Texas A&M University System<br>Huang, Yanlan<br>Sennett, Brian; University of Pennsylvania<br>Delgado, Kit; University of Pennsylvania |
| Keywords:                     | Health policy < HEALTH SERVICES ADMINISTRATION & MANAGEMENT,<br>Knee < ORTHOPAEDIC & TRAUMA SURGERY, PUBLIC HEALTH                                      |
|                               |                                                                                                                                                         |

SCHOLARONE™  
Manuscripts

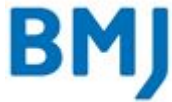

I, the Submitting Author has the right to grant and does grant on behalf of all authors of the Work (as defined in the below author licence), an exclusive licence and/or a non-exclusive licence for contributions from authors who are: i) UK Crown employees; ii) where BMJ has agreed a CC-BY licence shall apply, and/or iii) in accordance with the terms applicable for US Federal Government officers or employees acting as part of their official duties; on a worldwide, perpetual, irrevocable, royalty-free basis to BMJ Publishing Group Ltd ("BMJ") its licensees and where the relevant Journal is co-owned by BMJ to the co-owners of the Journal, to publish the Work in this journal and any other BMJ products and to exploit all rights, as set out in our [licence](#).

The Submitting Author accepts and understands that any supply made under these terms is made by BMJ to the Submitting Author unless you are acting as an employee on behalf of your employer or a postgraduate student of an affiliated institution which is paying any applicable article publishing charge ("APC") for Open Access articles. Where the Submitting Author wishes to make the Work available on an Open Access basis (and intends to pay the relevant APC), the terms of reuse of such Open Access shall be governed by a Creative Commons licence – details of these licences and which [Creative Commons](#) licence will apply to this Work are set out in our licence referred to above.

Other than as permitted in any relevant BMJ Author's Self Archiving Policies, I confirm this Work has not been accepted for publication elsewhere, is not being considered for publication elsewhere and does not duplicate material already published. I confirm all authors consent to publication of this Work and authorise the granting of this licence.

1  
2  
3  
4 **State Level Variation in Opioid Prescribing after Knee Arthroscopy among the Opioid-**  
5 **Naïve in the United States: 2012-2015**  
6  
7

8 **Corresponding Author:**

9 Benjamin Ukert, PhD 212 Adriance Lab Rd, 1266 TAMU, College Station, TX 77843. Email  
10 [bukert@tamu.edu](mailto:bukert@tamu.edu), phone 979-436-9056.  
11

12 **Authors:**

13 Benjamin Ukert<sup>1,2,4,5</sup>

14 Yanlan Huang, MS<sup>2,5</sup>

15 Brian Sennett, MD<sup>6</sup>

16 M. Kit Delgado, MD, MS<sup>2,3,4,5</sup>  
17  
18

- 19 1. Texas A&M University.
- 20 2. Center for Emergency Care Policy and Research, Department of Emergency Medicine,  
21 Perelman School of Medicine, University of Pennsylvania
- 22 3. Department of Biostatistics, Epidemiology, and Informatics, Perelman School of  
23 Medicine, University of Pennsylvania
- 24 4. Penn Injury Science Center, University of Pennsylvania
- 25 5. Leonard Davis Institute of Health Economics, University of Pennsylvania
- 26 6. Division of Sports Medicine, Department of Orthopedics, University of Pennsylvania  
27

28 **Word Count:** 2,787  
29  
30  
31  
32  
33  
34  
35  
36  
37  
38  
39  
40  
41  
42  
43  
44  
45  
46  
47  
48  
49  
50  
51  
52  
53  
54  
55  
56  
57  
58  
59  
60

**Objective** It has been established that most patients prescribed opioids after minor surgery have tablets left over, better understanding the variation in opioid prescribing and variation in dosage of the prescription could guide efforts to reduce excessive prescribing. This study describes the state level variation in opioid prescribing after a knee arthroscopy among opioid naïve patients.

**Design** Retrospective cohort study.

**Setting:** Commercial insurance claims data.

**Participants:** 84,043 individual across the USA with commercial insurance who were opioid naïve and had a knee arthroscopy between 2012 and 2015.

**Exposure:** Patients who filled an opioid prescription within 3 days of a knee arthroscopy.

**Outcome measures:** Opioid prescriptions were measured as a pharmacy claim for filling an opioid within 3 days of a knee arthroscopy. We measured the patient and state level opioid prescribing rate, tablet count, morphine milligram equivalent dose per prescription, and risk-adjusted predicted opioid quantity.

**Results** Overall, 75% of patients filled an opioid prescription with a median tablet count of 40 and median morphine milligram equivalent of 300. Patients with an invasive procedure (27.9% vs 19.2%;  $p < 0.001$ ), higher education level ( $p < 0.001$ ), and fewer comorbidities (0.9 vs 1.2,  $p < 0.001$ ) had higher rates of opioid prescribing. The prescribing rate in the highest state, Nebraska (87%), was double the prescribing rate in the lowest state, South Dakota (41%). Comparing the case mix adjusted expected prescribing rate to the observed prescribing rate displayed that 17 states had observed prescribing rates that were higher than their expected prescribing rates.

**Conclusion** While 75% of patients were prescribed opioids wide variation in the likelihood of receiving a prescription depending on state of residence (41% to 87%) existed. The dosages prescribed were high and have been associated with transition to long-term use. These findings suggest there is substantial opportunity reduce excessive opioid prescribing for this common minor procedure.

#### **Article Summary (Strengths and limitations of this study):**

- This is among the first studies to demonstrate the degree of state-level variation in opioid prescribing rates for a common minor surgical procedure. This provides a clearer view of the degree to which prescribing rates can be reduced given that surgical approaches and pain response is not expected to dramatically vary by state.
- Another strength is the adjustment for demographic and clinical characteristics to account for differences in case-mix across states.
- Our study is a claims-based study does not capture prescriptions that were made but not filled by patients or prescriptions that were paid out of pocket. Furthermore, the demographic and clinical characteristics we could assess are limited.

## Introduction

Between 1999 and 2016 opioid prescribing quadrupled to over 259 million prescriptions per year. Opioid related deaths are the leading cause of unintentional death in the United States responsible for at least 63,000 fatalities in 2016.<sup>1</sup> For many procedures opioid analgesics have become the default standard of care for post-operative pain management and are the leading exposure of patients' to opioid prescriptions, particularly among the opioid-naïve, even after low-risk surgical procedures.<sup>2-5</sup> This can be problematic because a single prescription and higher dosage prescriptions have been associated with prolonged opioid use.<sup>6-14</sup> Furthermore, 50-70% of opioid tablets prescribed are never taken posing the risk of misuse and diversion.<sup>15</sup>

Surgical societies have called for more judicious opioid prescribing and have promoted the concept of "opioid stewardship" in post-operative pain.<sup>16-18</sup> As with longstanding efforts to promote antibiotic stewardship, the first step in establishing post-operative opioid stewardship initiatives is to establish baseline use, duration, and variation by procedure and indication.<sup>19</sup> Even though the national levels of prescribing are well documented, limited attention has been given to the regional variation in opioid prescribing for opioid naïve patients after common outpatient surgeries.<sup>4,20-22</sup> Orthopedic arthroscopic procedures account for 2 of the top 3 most common outpatient surgical procedures performed in the U.S., yet there is a dearth of literature benchmarking opioid prescribing rates and dosages for these procedures.<sup>23-25</sup> Knee arthroscopy is the most common outpatient orthopedic procedure in the U.S., with approximately 1 million procedures per year.<sup>26,27</sup> Establishing the baseline variation in opioid prescribing after knee arthroscopy is a critical knowledge gap to fill to establish quality improvement targets. Prescribing targets are essential in reducing excessive prescribing with a large potential public health impact given the volume of this procedure and current lack of consensus for this procedure on post-operative opioid use.

The goal of our study was to describe the patient and state level variation in post-operative opioid prescribing rates and dosages for opioid naïve patients after a knee

1  
2  
3 arthroscopy in the United States (U.S.). Our investigation focused on the prescribing practices  
4 among the commercially insured, a relatively unexplored group of individuals in terms of opioid  
5 prescribing, but the one with the highest risk of opioid use and abuse.<sup>7</sup> We hypothesized that  
6 there would be substantial variation in the state and patient level prescribing rates and dosages,  
7 even after accounting for patient characteristics.  
8  
9  
10  
11  
12

## 13 14 15 **Methods**

16 We used the Clinformatics Data Mart Database (OptumInsight) from 2012 through 2015,  
17 which comprises commercial insurance claims from a large national U.S. private health insurer  
18 covering 7.5 million lives annually represented in every state. We defined an index knee  
19 arthroscopy encounter as the earliest visit in which a beneficiary had a knee arthroscopy  
20 provider medical claim.<sup>28</sup>  
21  
22  
23  
24  
25  
26

27 We focused our analysis on opioid-naïve patients and excluded any patients who filled  
28 an opioid prescription within the six months preceding the index surgery date. We also excluded  
29 patients who did not receive the knee arthroscopy in the outpatient hospital or ambulatory  
30 surgical center setting to retain a more homogenous sample. Patients who did not have medical  
31 claims for the surgery and the operational facility charge on the same day or the day after were  
32 also excluded to mitigate concerns regarding the day of the actual surgery. Lastly, we excluded  
33 patients who had multiple knee arthroscopy surgeries to reduce the confounding effect of  
34 reoperation on the probability that opioid prescriptions were associated with additional  
35 surgeries.  
36  
37  
38  
39  
40  
41  
42  
43  
44  
45

46 We collected patient demographic information on age, gender, education, household  
47 income, ethnicity, and the state where the surgery was performed. We identified the patients'  
48 Elixhauser comorbidities, as well as diagnosis codes for drug abuse, alcohol abuse, depression,  
49 and psychoses from any medical claims filed in the previous six months. We also used Current  
50 Procedural Technology (CPT) codes to classify knee arthroscopy procedures based on  
51  
52  
53  
54  
55  
56  
57  
58  
59  
60

1  
2  
3 involvement of bone (invasive, such as anterior cruciate ligament repair) vs. soft tissue only  
4  
5 (non-invasive, such as simple knee arthroscopy) (See Appendix for a description).  
6  
7

### 8 *No Patient and Public Involvement*

9

10 This research was done without patient involvement. Patients were not invited to comment on  
11  
12 the study design and were not consulted to develop patient relevant outcomes or interpret the  
13  
14 results. Patients were not invited to contribute to the writing or editing of this document for  
15  
16 readability or accuracy.  
17  
18  
19  
20

### 21 *Definition of Opioid Prescription*

22

23 We identified prescription claims based on the pharmacy claims and identified opioids  
24  
25 according to National Drug Codes (excluding methadone and non-tablet formulations) filled  
26  
27 within 3 days of the index visit. See Appendix for a description of included opioids. We excluded  
28  
29 opioids primarily used for treatment of opioid use disorder. We attributed a filled prescription  
30  
31 within 3 days of the surgery to the physician by extracting the encrypted NPI on the pharmacy  
32  
33 claim. We also used the pharmacy claim to identify the drug name, strength, number of tablets,  
34  
35 and days supplied. We calculate morphine milligram equivalents (MME) per tablet based on  
36  
37 conversion factors available from the Center for Medicare & Medicaid Services, which were  
38  
39 used to calculate the total MME per prescription.  
40  
41  
42  
43

### 44 *Outcomes*

45

46 The goal of the study was to describe the prescription rate, defined as the percent of  
47  
48 opioid naïve patients who filled an opioid prescription within 3 days of the knee arthroscopy, and  
49  
50 the regional variation of the prescription rate across the U.S. states. Secondary outcomes of  
51  
52 interest were the average quantity (in tablets) per prescription, and the total Morphine Milligram  
53  
54 Equivalent (MME) of the prescription. To assess the geographic variation, we aggregated all  
55  
56  
57  
58  
59  
60



1  
2  
3 opioid outcomes to the state level, resulting in average outcomes for each state. We also  
4 analyzed the primary and secondary outcomes by procedure type (invasive vs. non-invasive).  
5  
6 Lastly, we utilized age, race, ethnicity, level of education, comorbidities, procedure, and state  
7 information to predict the probability of receiving an opioid prescription within 3 days using a  
8 logistic model to understand how observed vs. predicted prescribing patterns vary after  
9  
10 adjusting for patient characteristics. We then estimated observed-to-expected state-level  
11  
12 prescribing ratios with 95% confidence intervals, with values over 1 indicating patients in that  
13  
14 state that were more likely to fill opioids than expected, and less than 1 indicating patients in  
15  
16 states that were less likely to fill opioids than expected.  
17  
18  
19  
20  
21  
22  
23

## 24 **Results**

25  
26 During the study period 194,117 patients underwent knee arthroscopy. After exclusions,  
27  
28 84,043 opioid naïve patients were available for the final analysis (Figure 1) with 21,641 patients  
29  
30 undergoing an invasive arthroscopic procedure involving drilling or cutting of bone and 62,402  
31  
32 patients who had a non-invasive arthroscopic procedure in which only soft tissue work was  
33  
34 performed. Figure 1 displays that 75% of opioid naïve patients filled a prescription. The  
35  
36 prescription rate was slightly higher for invasive vs. non-invasive procedures (82% vs. 73%).  
37  
38 Compared to patients who did not fill an opioid prescription in Table 1, patients with an initial  
39  
40 opioid prescription were more likely to be younger (45.3 years of age vs 53.0 years of age,  
41  
42  $p<0.001$ ) and more predominately male (55.8% vs 54.0%,  $p<0.001$ ). Those who filled an opioid  
43  
44 prescription were more likely to be higher educated (have a bachelor's degree or more 23.9%  
45  
46 vs 19.7%,  $p\text{-value}<0.001$ ), were more likely to have household incomes above \$100,000 (47.7%  
47  
48 vs 41.3%  $p<0.001$ ), were slightly more likely to be white (78.3% vs 76.3%  $p<0.001$ ), and were  
49  
50 more likely to have an invasive procedure relative to a non-invasive procedure (27.9% vs  
51  
52 19.1%,  $p<0.001$ ). In terms of comorbidities, those who received an opioid prescription were  
53  
54  
55  
56  
57  
58  
59  
60

1  
2  
3 more likely to have fewer comorbidities than those who did not receive an opioid (0.9 vs. 1.2  
4  
5 Elixhauser Index score).  
6  
7  
8

### 9 10 **Variation in Patient Level Opioid Prescribing**

11 Patient variations were observed in opioid prescribing in terms of the number of tablets,  
12 the day's supply, and total MME for the 75% of patients who filled a prescription within 3 days of  
13 the index surgery (Figure 2). The median prescription was for 40 tablets (IQR 30-60), 300 MME  
14 (200-400), with a duration of 5 days (IQR 4-7) (Appendix Table 1). At the 90<sup>th</sup> percentile, a total  
15 of 5,341 patients filled a prescription with more than 60 tablets with a duration of at least 10  
16 days and an MME of more than 563 MME.  
17  
18  
19  
20  
21  
22  
23

24 Translating the dosage to MME per day suggests that the median patient received an  
25 average daily dosage of 60 MME, which is above the 50 MME level identified as increasing the  
26 risks for overdose death by the Center for Disease Control (CDC). In terms of differences in  
27 prescribing by procedure type, invasive procedures resulted in a slightly higher average  
28 quantity, MME, and day's supply than non-invasive procedures, however, these findings are  
29 not-statistically different from each other (Appendix Table 1 and Appendix Figure 1).  
30  
31  
32  
33  
34  
35  
36  
37  
38

### 39 **State Level Variation**

40 State level variation in the percent of patients who filled an opioid prescription within 3  
41 days of the index date was also observed (Figure 3). The observed prescription fill rate ranged  
42 from 41 percent in South Dakota to 87 percent in Nebraska (see also Appendix Table 2). Figure  
43 3 also highlights states in red and blue that had statistically different observed prescribing rates  
44 either above or below the expected prescribing rate adjusted for case mix and covariates.  
45  
46  
47  
48  
49  
50 Several states had observed prescribing rates well below the expected rate. South Dakota,  
51 North Dakota, West Virginia, and Minnesota had prescribing rates that were between 30 to 40  
52 percent lower than expected based on patient characteristics. In contrast, Rhode Island, Iowa,  
53  
54  
55  
56  
57  
58  
59  
60

1  
2  
3 Nebraska, and Massachusetts exhibited prescribing rates that were 10 percent higher than the  
4 expected rates. These results highlight significant variation in terms of prescribing even after  
5 adjusting for patient characteristics.  
6  
7  
8

9 Little differences emerged in observed relative to expected in terms of MME and tablet  
10 count. The average tablet count for all states was 42.63 with a median of 42.80 (IQR=40.72  
11 tablets to 45.01 tablets). Tablet count per prescription varied from 32.63 in Vermont to 49.17 in  
12 D.C. The average state level MME per prescription varied from 202 MME in Vermont to 457  
13 MME in Alaska, with an average MME of 310 MME and a median MME of 304 MME (IQR = 283  
14 MME to 326 MME) (Appendix Figures 2-4).  
15  
16  
17  
18  
19  
20  
21  
22  
23

## 24 Discussion

25  
26 In a sample of over 84,000 opioid naive commercially insured patients who underwent  
27 an outpatient knee arthroscopy between 2012 and 2015, we found high rates of opioid  
28 prescribing and large variation in patient and state level opioid prescribing rates, even after  
29 adjusting for key patient characteristics. Over 75% of patients filled an opioid prescription within  
30 3 days of the surgery date, where the median patient received a 6-day supply, a median tablet  
31 count of 45 tablets, and a dosage of 325 MME. There was twofold state level variation  
32 prescribing between the highest prescribing rate (87% in Nebraska) compared to the state with  
33 the lowest prescribing rate (41% in South Dakota), and this variation persisted even after  
34 adjustment for patient characteristics.  
35  
36  
37  
38  
39  
40  
41  
42  
43  
44

45 The significant variation in prescribing rates and dosages indicates there is ample room  
46 to reduce prescribing as we do not expect the pathophysiology of pain to be markedly different  
47 across state lines for these common outpatient procedures. The observed dosage suggests that  
48 the median patient received an average daily dosage of 60 MME, which is above the 50 MME  
49 level identified as increasing the risks for overdose death by the Center for Disease Control.<sup>29</sup>  
50  
51 Therefore, these prescribing levels may pose adverse health risks when alternative strategies  
52  
53  
54  
55  
56  
57  
58  
59  
60

1  
2  
3 may be equally effective for many patients.<sup>30,31</sup> Over 264,000 MME per day could have been  
4 prevented from being distributed if the MME level would not have exceeded the CDC's  
5 maximum recommended dosage of 50 MME per day. A growing general consensus outlines  
6 that prescriptions should not be written for more than 50 MME per day and no more than 6 days  
7 (i.e. 300 MME). Nevertheless, 50% of patients who filled a prescription received a dosage that is  
8 higher than the recommended threshold.<sup>28</sup>  
9  
10  
11  
12  
13  
14  
15

16 Our results expand previous work by examining more broadly the prescribing patterns  
17 after minor surgeries among opioid naïve patients who are commercially insured. Using data  
18 from a national commercial insurer allowed us to investigate the prescribing rates among a  
19 younger population that has a documented higher risk of opioid dependence and misuse.<sup>7,32,33</sup>  
20 To date, the existing evidence has predominately focused on inpatient procedures among single  
21 institutions or has focused on specific groups such as the military population or the elderly.<sup>5,13,34</sup>  
22  
23  
24  
25  
26  
27

28 In terms of the existing literature evaluating opioid prescribing after surgical procedures,  
29 our results imply similarly high rates of prescribing compared to those reported for inpatient  
30 procedures. Opioid prescribing after orthopedic surgery is very common and orthopedic surgery  
31 has one of the highest frequency of opioid claims among Medicare patients. This highlights  
32 limitations in opioid prescribing guidelines for minor surgeries and our results suggest that  
33 opioids seem to be written independent of type of procedure and expected pain.<sup>5</sup> This is  
34 especially worrisome in a time of an ongoing opioid epidemic that highlights excessive opioid  
35 prescribing and that the use of any opioids increases the risk of long-term opioid use.<sup>22</sup>  
36 Therefore, guidelines and regulations for orthopedic opioid prescription limits can significantly  
37 reduce the number of excessive opioids written, and patients at risk of opioid addiction and  
38 misuse.<sup>2,3</sup> Our findings also imply that post-operative pain management relies heavily on  
39 opioids, while more conservative treatments may be possible, especially for less severe cases,  
40 though few guidelines exist.<sup>30,31</sup>  
41  
42  
43  
44  
45  
46  
47  
48  
49  
50  
51  
52  
53  
54  
55  
56  
57  
58  
59  
60

1  
2  
3 Our findings also have implications for policymakers. The evidence of wide variation in  
4 opioid prescribing across states suggests that these differences may reflect different regulatory  
5 environments, prescribing preferences and practice patterns of physicians. Thus, state specific  
6 guidelines, over national guidelines, seem to drive prescribing decisions of physicians.  
7  
8 Implementation of Prescription Drug Monitoring Programs (PDMP) and prescribing limits may  
9 have contributed to the low levels of prescribing for some states, though many of were not in  
10 effect and mostly target non-opioid naïve populations. It also highlights that prescribing limits  
11 and other regulations remain an important tool to limit the supply of opioids and the risk of long-  
12 term opioid use among patients. Discussion regarding a 3-day supply limit highlights the  
13 continuously excessive level of prescribing without further guidance. In many cases, dispensed  
14 tablets are also not taken as prescribed resulting in large number of left over tablets, and  
15 increase the potential for diversion.<sup>32,35,36</sup> Thus, reducing the initial supply of opioids is also  
16 crucial to fight opioid diversion and the illegal use of opioids.  
17  
18  
19  
20  
21  
22  
23  
24  
25  
26  
27  
28  
29

30 Our results also have implications for clinicians, surgeons and health systems. Despite  
31 existing efforts by state officials, a large number of physicians prescribe opioids with a duration  
32 of greater than 7 days. Thus, it is clinically relevant to not only reduce the number of tablets,  
33 which are commonly left over and are at risk of diversion, but also to address the issue of  
34 dosage. From the health system perspective, it seems promising to implement lower electronic  
35 default guidelines to a pre-specified acceptable quantity and dosage, which has recently been  
36 shown to reduce opioid prescribing.<sup>37,38</sup>  
37  
38  
39  
40  
41  
42  
43  
44

45 Future research should aim at understanding how many opioid tablets are actually  
46 needed to control pain and to optimize and guide prescribing levels that minimize the  
47 opportunity for left over opioids and subsequent opioid diversion. Studies are also needed to  
48 identify whether a MME threshold level exists that is associated with prolonged use and other  
49 long-term unintended health outcomes and consequences on overall patient-care needs.<sup>24,25</sup>  
50  
51 Finally, understanding how state policies, guidelines, and culture contribute to the state-level  
52  
53  
54  
55  
56  
57  
58  
59  
60

1  
2  
3 variation in prescribing rates, particularly in low prescribing states is important in making  
4 appropriate recommendations for opioid prescribing. These factors could be translated to high  
5 prescribing states, reduce potentially excessive prescribing without harming patients.  
6  
7  
8  
9

## 10 11 **Limitations**

12  
13 This study has several limitations. First, the study can only speak to filled prescriptions (not  
14 prescribed prescriptions) obtained within the population that generated an insurance bill, and  
15 cannot speak to the number of consumed tablets, or measure opioid prescriptions obtained  
16 through other channels. We potentially underestimated the prescribing rate, as unfilled  
17 prescriptions and filled prescription paid out of pocket were not captured. Second, unmeasured  
18 differences between patients, such as access to different provider networks, co-payments and  
19 coinsurance may have contributed to the observable variation in opioid prescribing. Third,  
20 limitations in data do not allow us to decisively attribute patients to physicians. Excluding  
21 patients without a knee arthroscopy and an opioid prescription within a 3-day window should  
22 improve patient-physician match. Fourth, more recent data may have displayed lower  
23 prescribing rates given the extensive regulatory efforts to curb excessive prescribing, such as  
24 prescribing guidelines, and the large increase in illicit opioid use availability.<sup>39-41</sup> Lastly, our  
25 results are only generalizable to the general commercially insured opioid naïve population who  
26 received a knee arthroscopy, though our adjusted observed vs. expected prescribing rate has  
27 the potential for unobservable confounding to affect our estimates.  
28  
29  
30  
31  
32  
33  
34  
35  
36  
37  
38  
39  
40  
41  
42  
43  
44  
45  
46

## 47 **Conclusions**

48  
49 Our findings suggest that large variations in opioid prescribing among the opioid naïve  
50 exist and that the observed levels of prescribing can be described as excessive. While this is an  
51 important finding, excessive prescribing has additional long-term consequences for patient  
52 health. An important next step for future research is to understand how outpatient knee  
53  
54  
55  
56  
57  
58  
59  
60

1  
2  
3 arthroscopies impact long-term opioid use, especially among the opioid naïve, whether the  
4  
5 prescription level affects the probability of long-term use, and whether a prescription may impact  
6  
7 the patient's general long-term healthcare utilization pattern, and long-term health.  
8  
9  
10

## 11 **Acknowledgements**

12  
13  
14 **Competing Interests:** All authors declare no conflicts of interest.

15  
16 **Contributions:** BU and MKD conceived the study. YH acquired the data. BU and MKD  
17 conducted the analysis. MKD supervised the analysis. All authors interpreted the results. BU  
18 and MKD drafted the manuscript. All authors contributed to the critical revision of the  
19 manuscript. BU takes responsibility for the manuscript as a whole.  
20

21 **Funding:** "Research reported in this publication was supported by pilot grant funding from the  
22 National Institute On Drug Abuse (P30DA040500). The content is solely the responsibility of the  
23 authors and does not necessarily represent the official views of the National Institutes of Health.  
24 Dr. Delgado was also supported by the Abramson Family Foundation Fund for Acute Care and  
25 Injury Prevention Research."  
26

27 **Data Availability Statement:** Data is not available due to data sharing restrictions. Data can be  
28 purchased from Optum (please visit the website for more information:  
29 <https://www.optum.com/solutions/data-analytics.html>). Statistical code available upon request.  
30  
31  
32  
33  
34  
35  
36  
37  
38  
39  
40  
41  
42  
43  
44  
45  
46  
47  
48  
49  
50  
51  
52  
53  
54  
55  
56  
57  
58  
59  
60



## REFERENCES

1. Centers for Disease Control. (2017) Underlying Cause of Death, 1999-2016 [Data file].
2. Ringwalt, C., Gugelmann, H., Garrettson, M., Dasgupta, N., Chung, A.E., Proescholdbell, S.K. and Skinner, A.C., 2014. Differential prescribing of opioid analgesics according to physician specialty for Medicaid patients with chronic noncancer pain diagnoses. *Pain Research and Management*, 19(4), pp.179-185.
3. Chen, J.H., Humphreys, K., Shah, N.H. and Lembke, A., 2016. Distribution of opioids by different types of medicare prescribers. *JAMA internal medicine*, 176(2), pp.259-261.
4. Levy, B., Paulozzi, L., Mack, K.A. and Jones, C.M., 2015. Trends in opioid analgesic-prescribing rates by specialty, US, 2007–2012. *American journal of preventive medicine*, 49(3), pp.409-413.
5. Scully, R.E., Schoenfeld, A.J., Jiang, W., Lipsitz, S., Chaudhary, M.A., Learn, P.A., Koehlmoos, T., Haider, A.H. and Nguyen, L.L., 2018. Defining optimal length of opioid pain medication prescription after common surgical procedures. *JAMA surgery*, 153(1), pp.37-43.
6. Shah A. Characteristics of Initial Prescription Episodes and Likelihood of Long-Term Opioid Use—United States, 2006–2015. *MMWR. Morbidity and Mortality Weekly Report*. 2017;66.
7. Edlund MJ, Martin BC, Russo JE, Devries A, Braden JB, Sullivan MD. The role of opioid prescription in incident opioid abuse and dependence among individuals with chronic non-cancer pain: the role of opioid prescription. *Clinical journal of Pain*. 2014;30(7):557.
8. Barnett, M.L., Olenski, A.R. and Jena, A.B., 2017. Opioid-prescribing patterns of emergency physicians and risk of long-term use. *New England journal of medicine*, 376(7), pp.663-673.
9. Deyo RA, Hallvik SE, Hildebran C, et al. Association between initial opioid prescribing patterns and subsequent long-term use among opioid-naïve patients: A statewide retrospective cohort study. *Journal of General Internal Medicine*. 2017;32(1):21-27.
10. Rozet, I., Nishio, I., Robbertze, R., Rotter, D., Chansky, H. and Hernandez, A.V., 2014. Prolonged opioid use after knee arthroscopy in military veterans. *Anesthesia & Analgesia*, 119(2), pp.454-459.
11. Jeffery MM, Hooten WM, Hess EP, et al. Opioid Prescribing for Opioid-Naive Patients in Emergency Departments and Other Settings: Characteristics of Prescriptions and Association With Long-Term Use. *Annals of Emergency Medicine*. 2017 (e-pub ahead of print)
12. Soneji, N., Clarke, H.A., Ko, D.T. and Wijeyesundera, D.N., 2016. Risks of developing persistent opioid use after major surgery. *JAMA surgery*, 151(11), pp.1083-1084.
13. Jiang, X., Orton, M., Feng, R., Hossain, E., Malhotra, N.R., Zager, E.L. and Liu, R., 2017. Chronic opioid usage in surgical patients in a large academic center. *Annals of surgery*, 265(4), p.722.



14. Delgado, M.K., Huang, Y., Meisel, Z., Hennessy, S., Yokell, M., Polsky, D. and Perrone, J., 2018. National Variation in Opioid Prescribing and Risk of Prolonged Use for Opioid-Naive Patients Treated in the Emergency Department for Ankle Sprains. *Annals of emergency medicine*.
15. Bicket, M.C., Long, J.J., Pronovost, P.J., Alexander, G.C. and Wu, C.L., 2017. Prescription opioid analgesics commonly unused after surgery: a systematic review. *JAMA surgery*, 152(11), pp.1066-1071.
16. American College of Surgeons Bulletin, August 2017, Volume 102, Number 8.
17. Varley, P.R. and Zuckerbraun, B.S., 2018. Opioid Stewardship and the Surgeon. *JAMA surgery*, 153(2), pp.e174875-e174875.
18. Trasolini, N.A., McKnight, B.M. and Dorr, L.D., 2018. The Opioid Crisis and the Orthopedic Surgeon. *The Journal of arthroplasty*, 33(11), pp.3379-3382.
19. Gauthier, T.P., Lantz, E., Heyliger, A., Francis, S.M. and Smith, L., 2014. Internet-based institutional antimicrobial stewardship program resources in leading US academic medical centers. *Clinical infectious diseases*, 58(3), pp.445-446.
20. Curtis, L.H., Stoddard, J., Radeva, J.I., Hutchison, S., Dans, P.E., Wright, A., Woosley, R.L. and Schulman, K.A., 2006. Geographic variation in the prescription of schedule II opioid analgesics among outpatients in the United States. *Health services research*, 41(3p1), pp.837-855.
21. McDonald, D.C., Carlson, K. and Izrael, D., 2012. Geographic variation in opioid prescribing in the US. *The journal of Pain*, 13(10), pp.988-996
22. Sun, E.C., Darnall, B.D., Baker, L.C. and Mackey, S., 2016. Incidence of and risk factors for chronic opioid use among opioid-naive patients in the postoperative period. *JAMA internal medicine*, 176(9), pp.1286-1293.
23. Alam, A., Gomes, T., Zheng, H., Mamdani, M.M., Juurlink, D.N. and Bell, C.M., 2012. Long-term analgesic use after low-risk surgery: a retrospective cohort study. *Archives of internal medicine*, 172(5), pp.425-430.
24. Clarke H, Soneji N, Ko DT, Yun L, Wijeyesundera DN. Rates and risk factors for prolonged opioid use after major surgery: population based cohort study. *BMJ*. 2014;348:g1251.
25. Brummett, C.M., Waljee, J.F., Goesling, J., Moser, S., Lin, P., Englesbe, M.J., Bohnert, A.S., Kheterpal, S. and Nallamothu, B.K., 2017. New persistent opioid use after minor and major surgical procedures in US adults. *JAMA surgery*, 152(6), pp.e170504-e170504.
26. Steiner, C.A., Karaca, Z., Moore, B.J., Imshaug, M.C. and Pickens, G., 2017. Surgeries in Hospital-Based Ambulatory Surgery and Hospital Inpatient Settings, 2014: Statistical Brief# 223.

- 1  
2  
3 27. Kim, S., Bosque, J., Meehan, J.P., Jamali, A. and Marder, R., 2011. Increase in outpatient  
4 knee arthroscopy in the United States: a comparison of National Surveys of Ambulatory  
5 Surgery, 1996 and 2006. *JBJS*, 93(11), pp.994-1000.  
6  
7 28. Optum.com. Clinformatics Data Mart. Available at:  
8 [https://www.optum.com/content/dam/optum/resources/productSheets/Clinformatics\\_for\\_Data\\_Mart.pdf](https://www.optum.com/content/dam/optum/resources/productSheets/Clinformatics_for_Data_Mart.pdf). Accessed November 28, 2018.  
9  
10  
11 29. Centers for Disease Control and Prevention, 2017. Calculating total daily dose of opioids for  
12 safer dosage. Available at: (Accessed January 17, 2018) [https://www.cdc.gov/drugoverdose/pdf/calculating\\_total\\_daily\\_dose-a.pdf](https://www.cdc.gov/drugoverdose/pdf/calculating_total_daily_dose-a.pdf) View in Article| Google Scholar.  
13  
14  
15 30. Chou, R., Gordon, D.B., de Leon-Casasola, O.A., Rosenberg, J.M., Bickler, S., Brennan, T.,  
16 Carter, T., Cassidy, C.L., Chittenden, E.H., Degenhardt, E. and Griffith, S., 2016.  
17 Management of Postoperative Pain: a clinical practice guideline from the American pain  
18 society, the American Society of Regional Anesthesia and Pain Medicine, and the American  
19 Society of Anesthesiologists' committee on regional anesthesia, executive committee, and  
20 administrative council. *The Journal of Pain*, 17(2), pp.131-157.  
21  
22 31. Hegmann, K.T., Weiss, M.S., Bowden, K., Branco, F., DuBrueier, K., Els, C., Mandel, S.,  
23 McKinney, D.W., Miguel, R., Mueller, K.L. and Nadig, R.J., 2014. ACOEM practice  
24 guidelines: opioids for treatment of acute, subacute, chronic, and postoperative  
25 pain. *Journal of occupational and environmental medicine*, 56(12), pp.e143-e159.  
26  
27 32. Hall AJ, Logan JE, Toblin RL, et al. Patterns of abuse among unintentional pharmaceutical  
28 overdose fatalities. *JAMA*. 2008;300(22):2613-2620.  
29  
30 33. Edlund MJ, Steffick D, Hudson T, Harris KM, Sullivan M. Risk factors for clinically  
31 recognized opioid abuse and dependence among veterans using opioids for chronic non-  
32 cancer pain. *Pain*. 2007;129(3):355-362.  
33  
34 34. Hill, M.V., McMahon, M.L., Stucke, R.S. and Barth, R.J., 2017. Wide variation and excessive  
35 dosage of opioid prescriptions for common general surgical procedures. *Annals of  
36 surgery*, 265(4), pp.709-714.  
37  
38 35. Bicket MC, Long JJ, Pronovost PJ, Alexander GC, Wu CL. Prescription opioid analgesics  
39 commonly unused after surgery: A systematic review. *Jama Surgery*. 2017;152(11):1066-  
40 1071.  
41  
42 36. Maughan BC, Hersh EV, Shofer FS, et al. Unused opioid analgesics and drug disposal  
43 following outpatient dental surgery: a randomized controlled trial. *Drug and Alcohol  
44 Dependence*. 2016;168:328-334.  
45  
46 37. Delgado MK, Shofer, FS, Patel, MS, Halpern SD, Edwards, C, Meisel, ZF, Perrone, J.  
47 Association between Electronic Medical Record Implementation of Default Opioid  
48 Prescription Quantities on Prescribing Behavior in Two Emergency Departments. *Journal of  
49 General Internal Medicine*. 2018 (in press).  
50  
51 38. Chiu AS, Jean RA, Hoag JR, Freedman-Weiss M, Healy JM, Pei KY. Association of lowering  
52 default pill counts in electronic medical record systems with postoperative opioid prescribing.  
53 *JAMA surgery*. 2018 Jul 18.  
54  
55  
56  
57  
58  
59  
60

- 1  
2  
3  
4 39. Weiner SG, Baker O, Poon SJ, Rodgers AF, Garner C, Nelson LS, Schuur JD. The effect of  
5 opioid prescribing guidelines on prescriptions by emergency physicians in Ohio. *Annals of*  
6 *emergency medicine*. 2017 Dec 1;70(6):799-808.  
7 40. Jones CM, Logan J, Gladden RM, Bohm MK. Vital signs: demographic and substance use  
8 trends among heroin users—United States, 2002–2013. *MMWR. Morbidity and mortality*  
9 *weekly report*. 2015 Jul 10;64(26):719.  
10  
11 41. Guy JG, Zhang K, Bohm MK, Losby J, Lewis B, Young R, Murphy LB, Dowell D. Vital signs:  
12 changes in opioid prescribing in the United States, 2006-2015. *MMWR. Morbidity and*  
13 *mortality weekly report*. 2017 Jul;66(26):697-704.  
14  
15  
16  
17  
18  
19  
20  
21  
22  
23  
24  
25  
26  
27  
28  
29  
30  
31  
32  
33  
34  
35  
36  
37  
38  
39  
40  
41  
42  
43  
44  
45  
46  
47  
48  
49  
50  
51  
52  
53  
54  
55  
56  
57  
58  
59  
60

For peer review only

### Figure 1 – Flowchart of Sample

Notes: Figure 1 displays the flowchart from the full sample that leads to our final sample after sample exclusion restrictions

### Figure 2 – Details on the Prescriptions Filled within 3 Days of the Index Date

Notes: Figure 2 displays the distribution of the opioid fill for members who filled an opioid within 3 days of the index date for the quantity, MME, and days supply.

### Figure 3 – Observed to Expected Opioid Prescribing Rate

Notes: State-level variation in the opioid prescribing rate for knee arthroscopies among patients who were opioid naïve. The median state-level prescribing rate during these years was 75%. The observed prescribed rate is displayed within each state. States with higher-than-expected prescribing rates based on covariates are highlighted in red and those with lower-than-expected prescribing rates are shown in blue. Expected prescribing rate was adjusted for case mix with age, sex, procedure type, race, ethnicity, education, household income, comorbidities, and year, using multivariate logistic regression.

**Table 1 – Patient Characteristics Stratified by Filled Prescription within 3 Days of Surgery**

| Patient Characteristics   | Opioid Naïve  | Opioid Naïve and Opioid Prescription | P      |
|---------------------------|---------------|--------------------------------------|--------|
|                           | (n = 20,604)  | (n=63,439)                           |        |
| <b>Age (Mean, SD)</b>     | 53.03 (17.19) | 45.29 (17.18)                        | <0.001 |
| <b>Gender</b>             |               |                                      |        |
| Male                      | 11119 (54.0%) | 35402 (55.8%)                        | <0.001 |
| Female                    | 9478 (46.0%)  | 28031 (44.2%)                        |        |
| Unknown                   | 7 (0.0%)      | 6 (0.0%)                             |        |
| <b>Education level</b>    |               |                                      | <0.001 |
| No High School Degree     | 32 (0.2%)     | 113 (0.2%)                           |        |
| High School Degree        | 4651 (22.6%)  | 12740 (20.1%)                        |        |
| Some College              | 11073 (53.7%) | 34427 (54.3%)                        |        |
| Bachelor's Degree or More | 4051 (19.7%)  | 15160 (23.9%)                        |        |
| Unknown                   | 797 (3.9%)    | 999 (1.6%)                           |        |
| <b>Procedure Type</b>     |               |                                      |        |
| Invasive                  | 3929 (19.1%)  | 17712 (27.9%)                        | <0.001 |
| <b>HH Income</b>          |               |                                      | <0.001 |
| Less than 40k HH Income   | 2404 (12.1%)  | 5273 (8.4%)                          |        |
| 40-49k HH Income          | 1197 (6.0%)   | 2951 (4.7%)                          |        |
| 50-59k HH Income          | 1284 (6.5%)   | 3393 (5.4%)                          |        |
| 60-74k HH Income          | 1945 (9.8%)   | 5692 (9.1%)                          |        |
| 75-99k HH Income          | 2958 (14.9%)  | 9139 (14.6%)                         |        |
| 100k and More             | 8196 (41.3%)  | 29849 (47.7%)                        |        |

|                                           |               |                 |        |
|-------------------------------------------|---------------|-----------------|--------|
| Unknown                                   | 1880 ( 9.5%)  | 6332 (10.1%)    |        |
| <b><u>Ethnicity</u></b>                   |               |                 | <0.001 |
| Asian                                     | 442 ( 2.1%)   | 1580 ( 2.5%)    |        |
| Black                                     | 1377 ( 6.7%)  | 4112 ( 6.5%)    |        |
| Hispanic                                  | 1550 ( 7.5%)  | 4925 ( 7.8%)    |        |
| White                                     | 15725 (76.3%) | 49654 (78.3%)   |        |
| Unknown                                   | 1510 (7.3%)   | 3168 (5.0%)     |        |
| <b><u>Comorbidity</u></b>                 |               |                 |        |
| Mean No. of Elixhauser Comorbidities (SD) | 1.24 (1.50%)  | 0.90 (1.26%)    | <0.001 |
| Hypertension (%)                          | 7300 (35.4%)  | 15748 (24.8%)   | <0.001 |
| Chronic pulmonary disease (%)             | 2001 ( 9.7%)  | 5329 ( 8.4%)    | <0.001 |
| Depression (%)                            | 1714 ( 8.3%)  | 4868 ( 7.7%)    | 0.003  |
| Diabetes (%)                              | 2258 (11.0%)  | 4771 ( 7.5%)    | <0.001 |
| Psychoses (%)                             | 74 ( 0.4%)    | 156 ( 0.2%)     | 0.009  |
| Alcohol abuse (%)                         | 110 ( 0.5%)   | 346 ( 0.5%)     | 0.888  |
| Drug abuse (%)                            | 117 ( 0.6%)   | 239 ( 0.4%)     | <0.001 |
| Median No. Tablets (IQR)                  | -             | 40 (30 - 60)    |        |
| Days supplied, median (IQR)               | -             | 5 (4 - 7)       |        |
| MME/prescription, mean (SD)               | -             | 305.48 (189.01) |        |

**Figure 1 – Flowchart of Sample**

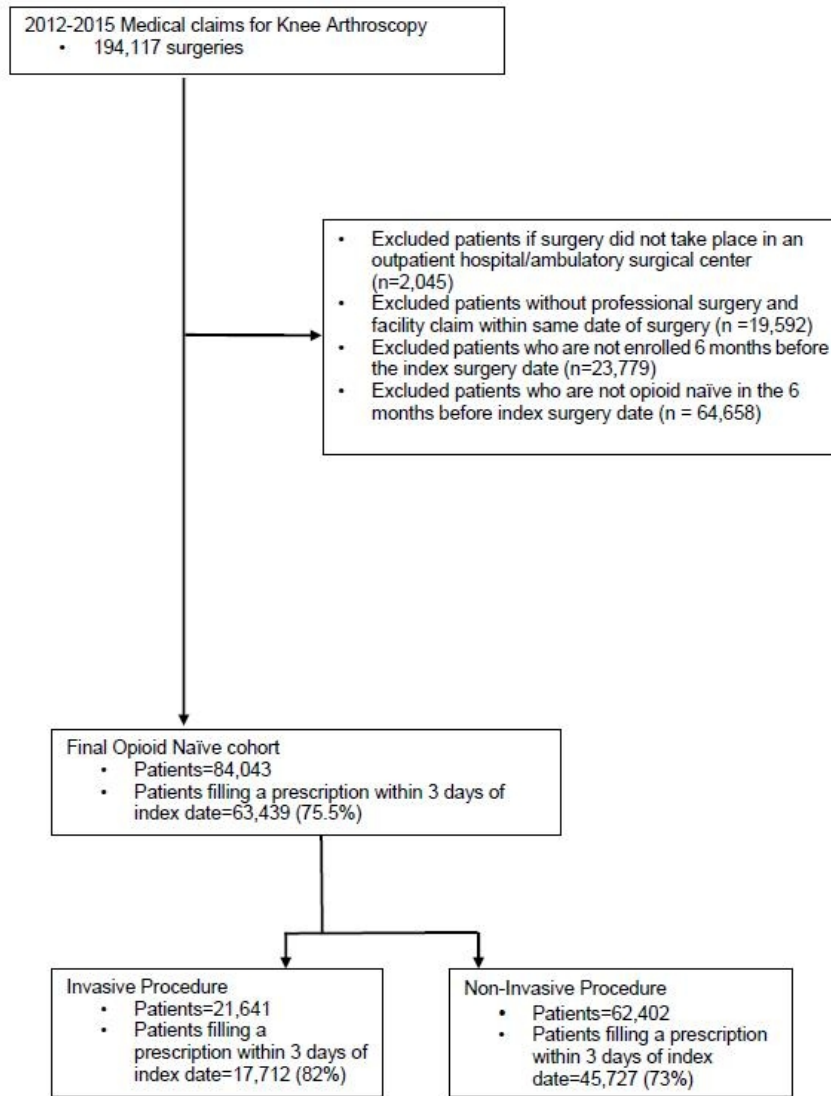

Notes: Figure 1 displays the flowchart from the full sample that leads to our final sample after sample exclusion restrictions

112x142mm (144 x 144 DPI)

1  
2  
3  
4  
5  
6  
7  
8  
9  
10  
11  
12  
13  
14  
15  
16  
17  
18  
19  
20  
21  
22  
23  
24  
25  
26  
27  
28  
29  
30  
31  
32  
33  
34  
35  
36  
37  
38  
39  
40  
41  
42  
43  
44  
45  
46  
47  
48  
49  
50  
51  
52  
53  
54  
55  
56  
57  
58  
59  
60

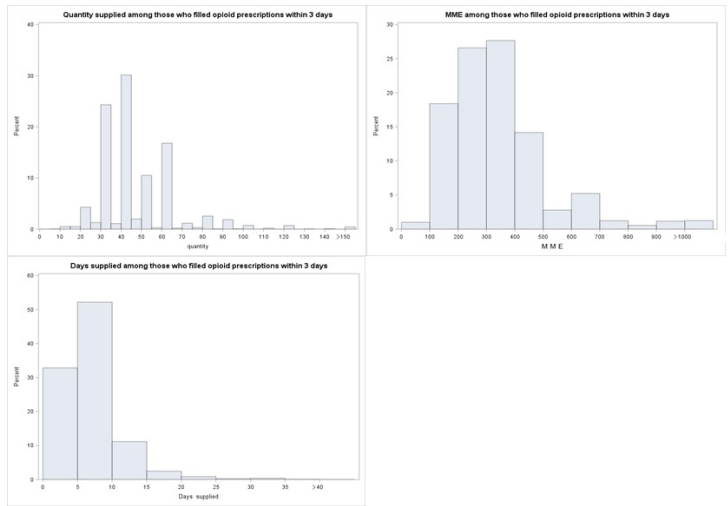

Notes: Figure 2 displays the distribution of the opioid fill for members who filled an opioid within 3 days of the index date for the quantity, MME, and days supply.

203x114mm (144 x 144 DPI)



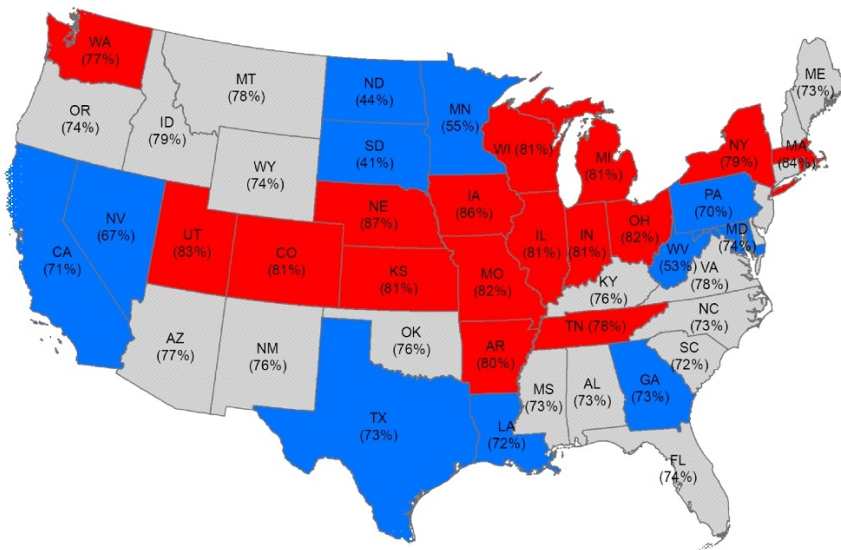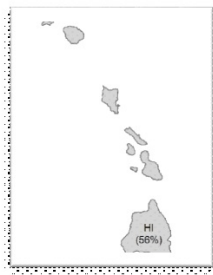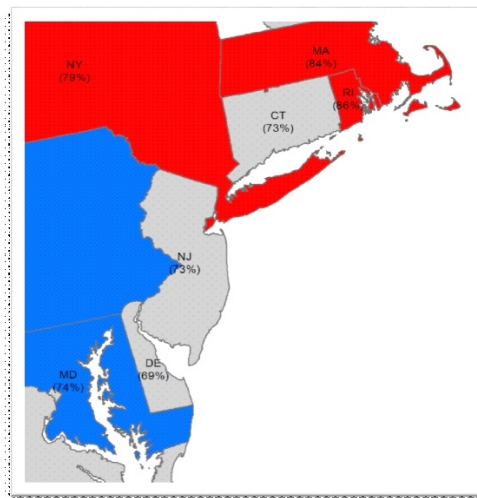

Notes: State-level variation in the opioid prescribing rate for knee arthroscopies among patients who were opioid naive. The median state-level prescribing rate during these years was 75%. The observed prescribed rate is displayed within each state. States with higher-than-expected prescribing rates based on covariates are highlighted in red and those with lower-than-expected prescribing rates are shown in blue. Expected prescribing rate was adjusted for case mix with age, sex, procedure type, race, ethnicity, education, household income, comorbidities, and year, using multivariate logistic regression.

203x232mm (144 x 144 DPI)



**APPENDIX***Definition of new Arthroscopy by CPT code:*

Arthroscopic procedures with significant bony work or expected increased pain (i.e. total synovectomy) involved: 29876, 29885, 29886, 29887, 29888, 29889

Arthroscopic procedures that do not involve significant bony work:

29870, 29871, 29873, 29874, 29875, 29877, 29879, 29880, 29881, 29882, 29883, 29884

*Opioid classes identified in pharmacy claims and included:* Codeine, Dihydrocodeine, Fentanyl, Hydrocodone, Hydromorphone, Meperidine, Morphine, Oxycodone, Oxymorphone, Tapentadol, Tramadol

**Appendix Table 1 – Opioid Prescribing Information for filled Prescription within 3 days of Surgery Date (N=63,439)**

| <b>Quantity</b>    | <b>Mean</b>        | <b>Min</b> | <b>10%</b> | <b>Median</b>        | <b>90%</b> | <b>95%</b> | <b>Max</b> |
|--------------------|--------------------|------------|------------|----------------------|------------|------------|------------|
| Total              | 45.53<br>(25.31)   | 3          | 30         | 40<br>(IQR 30-60)    | 60         | 80         | 1500       |
| Non-Invasive       | 42.96<br>(21.15)   | 21.15      | 3          | 15<br>(IQR 30-50)    | 20         | 30         | 30         |
| Invasive           | 52.16<br>(32.82)   | 32.83      | 4          | 20<br>(IQR 40-60)    | 30         | 30         | 40         |
| <b>MME</b>         | <b>Mean</b>        | <b>Min</b> | <b>10%</b> | <b>Median</b>        | <b>90%</b> | <b>95%</b> | <b>Max</b> |
| Total              | 325.14<br>(221.87) | 13.5       | 150        | 300<br>(IQR 200-400) | 562.5      | 675        | 11250      |
| Non-Invasive       | 293.71<br>(182.25) | 182.25     | 13.5       | 90<br>(IQR 200-375)  | 125        | 150        | 200        |
| Invasive           | 406.28<br>(285.37) | 285.37     | 25         | 100<br>(IQR 225-450) | 150        | 187.5      | 225        |
| <b>Days Supply</b> | <b>Mean</b>        | <b>Min</b> | <b>10%</b> | <b>Median</b>        | <b>90%</b> | <b>95%</b> | <b>Max</b> |
| Total              | 6.13<br>(3.66)     | 1          | 3          | 5<br>(IQR 4-7)       | 10         | 13         | 40         |
| Non-Invasive       | 5.81<br>(3.36)     | 3.37       | 1          | 2<br>(IQR 4-7)       | 3          | 3          | 4          |
| Invasive           | 6.99<br>(4.30)     | 4.30       | 1          | 2<br>(IQR 5-8)       | 3          | 3          | 5          |

Notes: Mean opioid prescribing information for quantity, MME, and days supply are displayed for those members who filled an opioid within 3 days.. Information on the minimum, medium, maximum, and the 10, 90, and 95 percentile are also reported.

**Appendix Table 2 – Average Observed Prescribing Rates, Quantity, and MME by State**

| State          | Prescribing |         |        |
|----------------|-------------|---------|--------|
|                | Rate        | Tablets | MME    |
| Alaska         | 0.52        | 47.06   | 457.94 |
| Alabama        | 0.73        | 39.88   | 326.81 |
| Arkansas       | 0.80        | 39.37   | 318.40 |
| Arizona        | 0.77        | 42.30   | 293.89 |
| California     | 0.71        | 46.54   | 349.71 |
| Colorado       | 0.81        | 39.27   | 282.30 |
| Connecticut    | 0.73        | 35.56   | 256.02 |
| D.C.           | 0.81        | 49.17   | 384.64 |
| Delaware       | 0.69        | 47.10   | 319.15 |
| Florida        | 0.74        | 43.25   | 315.58 |
| Georgia        | 0.73        | 41.26   | 325.12 |
| Hawaii         | 0.56        | 35.97   | 210.16 |
| Iowa           | 0.86        | 40.85   | 279.07 |
| Idaho          | 0.79        | 46.66   | 409.32 |
| Illinois       | 0.81        | 41.34   | 276.02 |
| Indiana        | 0.81        | 45.01   | 301.75 |
| Kansas         | 0.81        | 44.33   | 320.70 |
| Kentucky       | 0.76        | 46.40   | 360.57 |
| Louisiana      | 0.72        | 41.53   | 350.16 |
| Massachusetts  | 0.84        | 44.17   | 302.66 |
| Maryland       | 0.74        | 42.60   | 304.63 |
| Maine          | 0.73        | 40.59   | 258.13 |
| Michigan       | 0.81        | 45.02   | 304.58 |
| Minnesota      | 0.55        | 39.88   | 259.07 |
| Missouri       | 0.82        | 44.73   | 291.65 |
| Mississippi    | 0.73        | 37.05   | 307.16 |
| Montana        | 0.78        | 41.89   | 294.48 |
| North Carolina | 0.73        | 46.14   | 343.04 |
| North Dakota   | 0.44        | 37.84   | 269.32 |
| Nebraska       | 0.87        | 44.04   | 297.32 |
| New Hampshire  | 0.74        | 38.08   | 260.10 |
| New Jersey     | 0.73        | 37.57   | 273.93 |
| New Mexico     | 0.76        | 42.24   | 303.73 |
| Nevada         | 0.67        | 49.37   | 389.56 |
| New York       | 0.79        | 44.80   | 308.36 |
| Ohio           | 0.82        | 46.23   | 301.26 |
| Oklahoma       | 0.76        | 44.78   | 378.17 |
| Oregon         | 0.74        | 45.35   | 329.20 |
| Pennsylvania   | 0.70        | 42.40   | 289.84 |
| Rhode Island   | 0.86        | 42.19   | 291.07 |

|    |                |      |       |        |
|----|----------------|------|-------|--------|
| 1  |                |      |       |        |
| 2  |                |      |       |        |
| 3  |                |      |       |        |
| 4  | South Carolina | 0.72 | 45.53 | 373.65 |
| 5  | South Dakota   | 0.41 | 43.77 | 263.02 |
| 6  | Tennessee      | 0.78 | 38.76 | 315.16 |
| 7  | Texas          | 0.73 | 42.80 | 317.44 |
| 8  | Utah           | 0.83 | 42.50 | 351.69 |
| 9  | Virginia       | 0.78 | 43.05 | 304.13 |
| 10 | Vermont        | 0.77 | 32.63 | 202.68 |
| 11 | Washington     | 0.77 | 43.74 | 308.70 |
| 12 | Wisconsin      | 0.81 | 42.94 | 284.22 |
| 13 | West Virginia  | 0.53 | 42.40 | 282.45 |
| 14 | Wyoming        | 0.74 | 46.33 | 316.12 |
| 15 |                |      |       |        |
| 16 |                |      |       |        |
| 17 |                |      |       |        |
| 18 |                |      |       |        |
| 19 |                |      |       |        |
| 20 |                |      |       |        |
| 21 |                |      |       |        |
| 22 |                |      |       |        |
| 23 |                |      |       |        |
| 24 |                |      |       |        |
| 25 |                |      |       |        |
| 26 |                |      |       |        |
| 27 |                |      |       |        |
| 28 |                |      |       |        |
| 29 |                |      |       |        |
| 30 |                |      |       |        |
| 31 |                |      |       |        |
| 32 |                |      |       |        |
| 33 |                |      |       |        |
| 34 |                |      |       |        |
| 35 |                |      |       |        |
| 36 |                |      |       |        |
| 37 |                |      |       |        |
| 38 |                |      |       |        |
| 39 |                |      |       |        |
| 40 |                |      |       |        |
| 41 |                |      |       |        |
| 42 |                |      |       |        |
| 43 |                |      |       |        |
| 44 |                |      |       |        |
| 45 |                |      |       |        |
| 46 |                |      |       |        |
| 47 |                |      |       |        |
| 48 |                |      |       |        |
| 49 |                |      |       |        |
| 50 |                |      |       |        |
| 51 |                |      |       |        |
| 52 |                |      |       |        |
| 53 |                |      |       |        |
| 54 |                |      |       |        |
| 55 |                |      |       |        |
| 56 |                |      |       |        |
| 57 |                |      |       |        |
| 58 |                |      |       |        |
| 59 |                |      |       |        |
| 60 |                |      |       |        |

Appendix Figure 1 – Distribution on the Filled Prescriptions within 3 Days of the Index Date by Invasive vs. Non-invasive Procedure

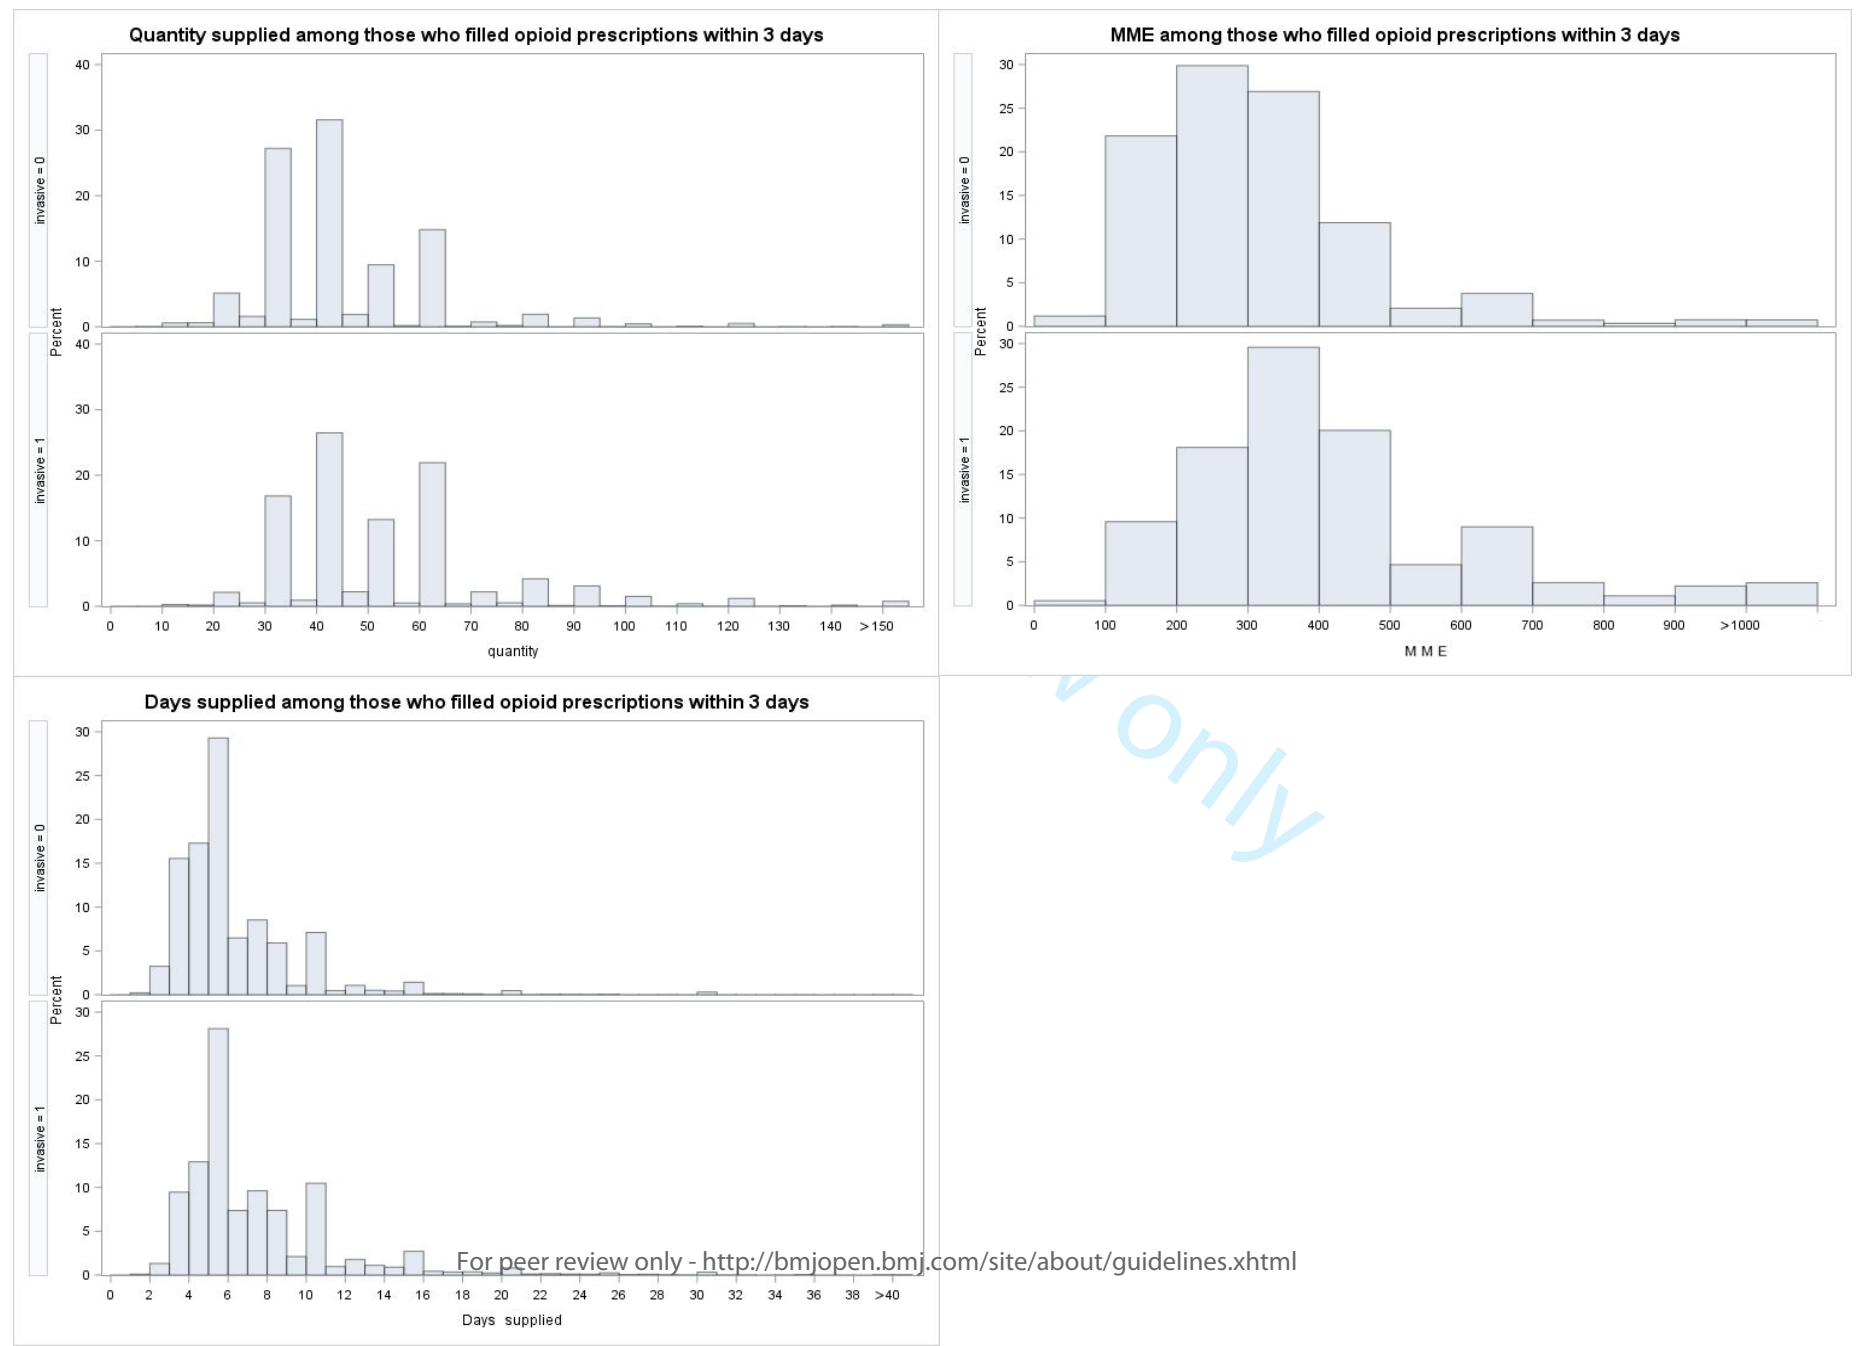

Appendix Figure 2 – Observed to Expected Opioid Prescribing Rate by State

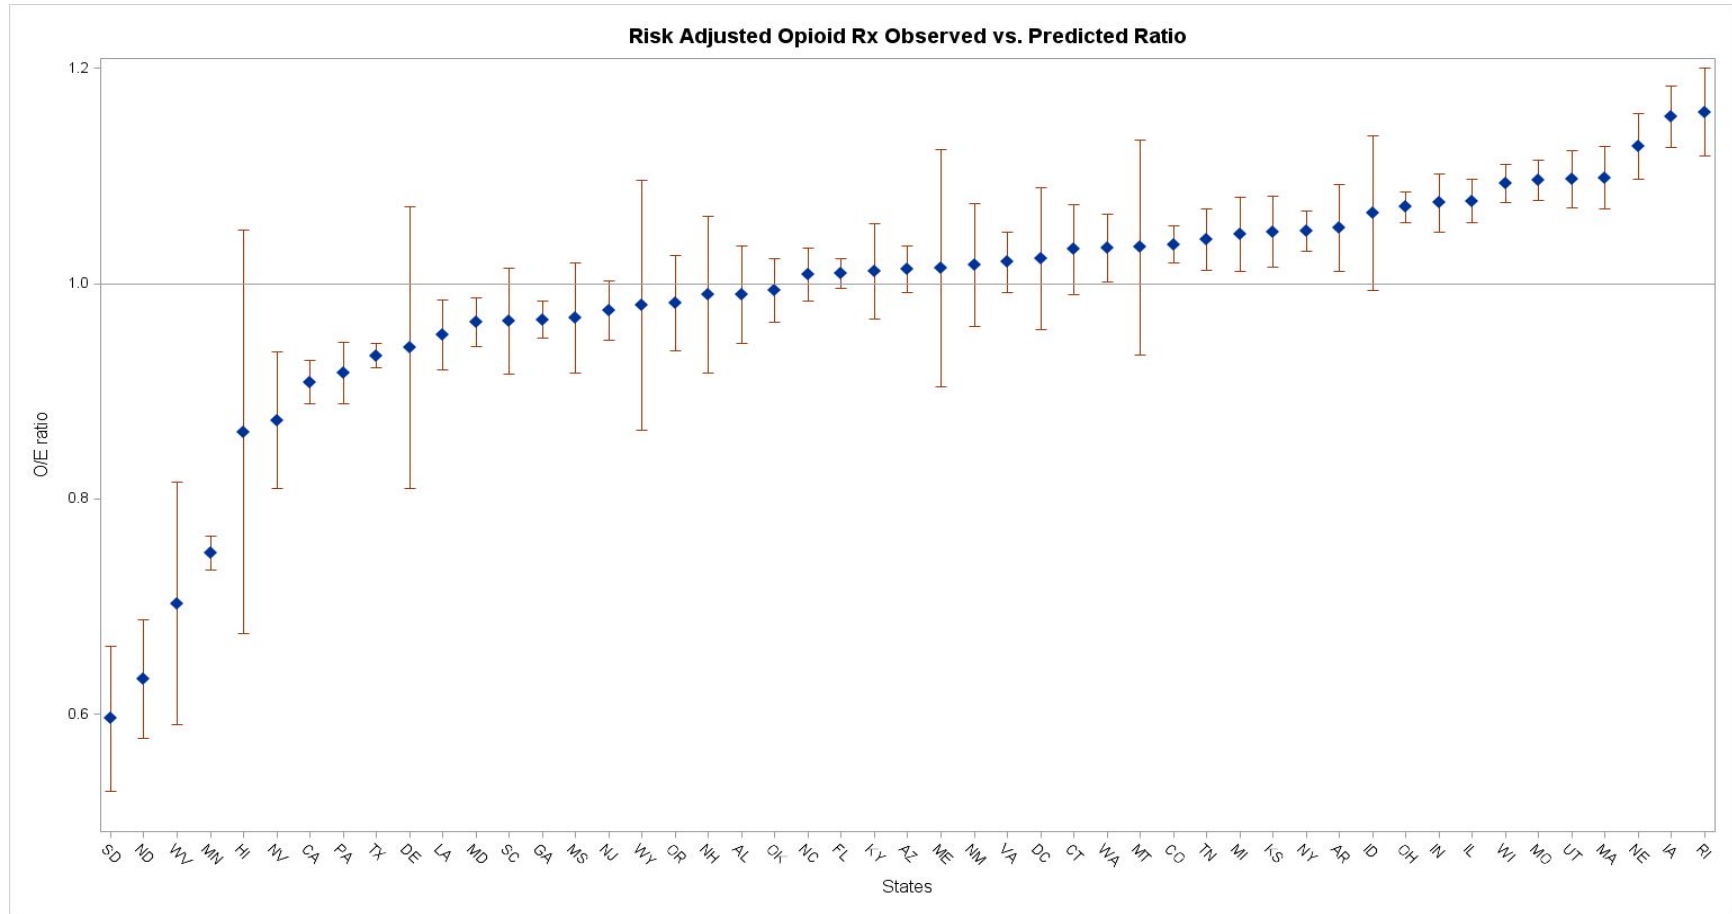

Notes: State-level variation in the opioid prescribing rate for knee arthroscopies among patients who were opioid naive. The median state-level prescribing rate during these years was 75%. The observed to expected prescribed rate is displayed for each state with a 95% confidence interval. States with higher-than-expected prescribing rates are displayed with an O/E rate larger than 1. Expected prescribing rate was adjusted for case mix with age, sex, procedure type, race, ethnicity, education, household income, comorbidities, and year, using multivariate logistic regression.

Appendix Figure 3 – Observed to Expected Opioid MME per Encounter by State

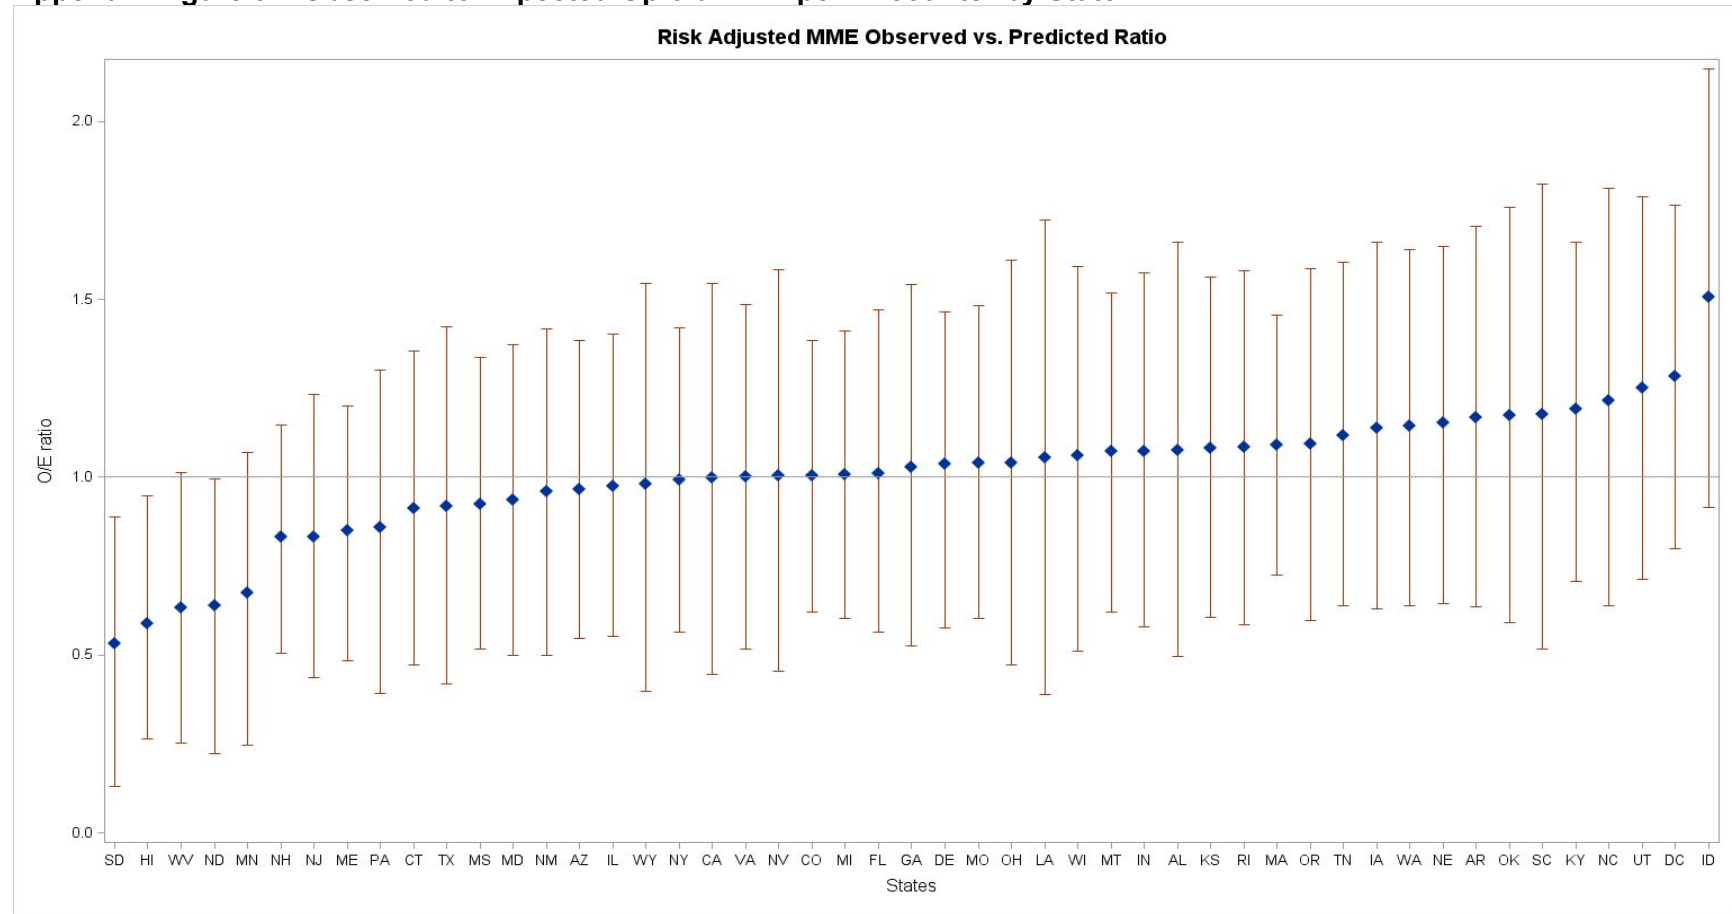

Notes: State-level variation in the opioid prescribing rate for knee arthroscopies among patients who were opioid naive. The median state-level prescribing rate during these years was 75%. The observed to expected prescribed rate is displayed for each state with a 95% confidence interval. States with higher-than-expected prescribing rates are displayed with an O/E rate larger than 1. Expected prescribing rate was adjusted for case mix with age, sex, procedure type, race, ethnicity, education, household income, comorbidities, and year, using multivariate logistic regression.

Appendix Figure 4 – Observed to Expected Opioid MME per Prescription by State

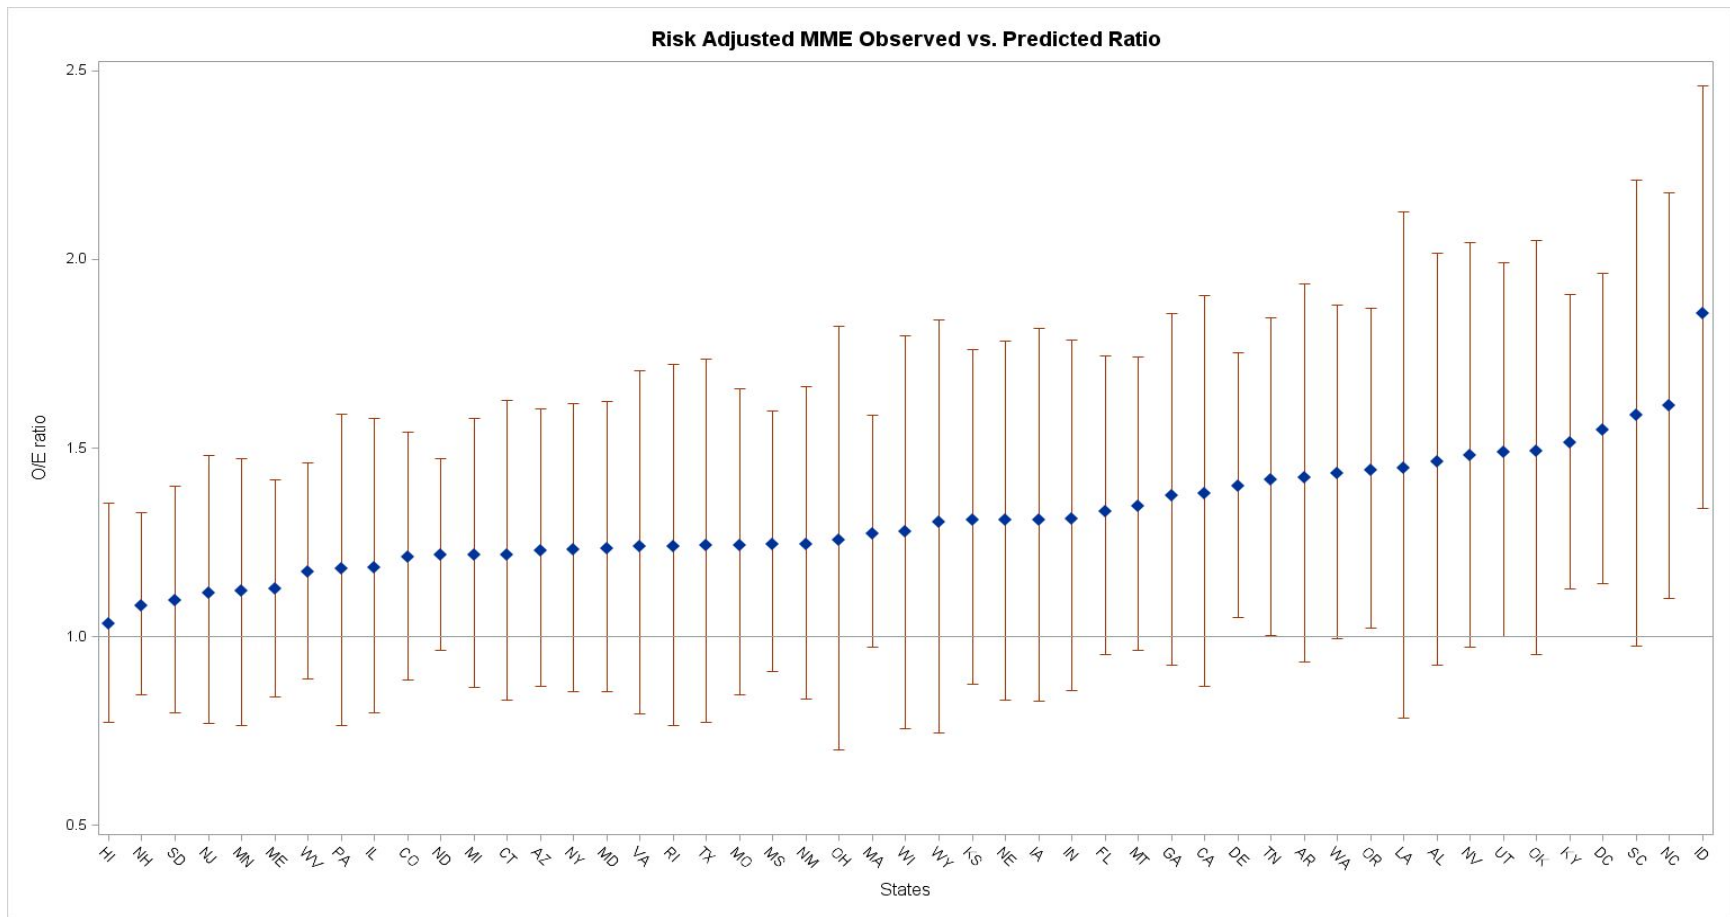

Notes: State-level variation in the opioid prescribing rate for knee arthroscopies among patients who were opioid naive. The median state-level prescribing rate during these years was 75%. The observed to expected prescribed rate is displayed for each state with a 95% confidence interval. States with higher-than-expected prescribing rates are displayed with an O/E rate larger than 1. Expected prescribing rate was adjusted for case mix with age, sex, procedure type, race, ethnicity, education, household income, comorbidities, and year, using multivariate logistic regression.



STROBE Statement—Checklist of items that should be included in reports of *cross-sectional studies*

|                              | Item No | Recommendation                                                                                                                                                                                               | Page No |
|------------------------------|---------|--------------------------------------------------------------------------------------------------------------------------------------------------------------------------------------------------------------|---------|
| <b>Title and abstract</b>    | 1       | (a) Indicate the study's design with a commonly used term in the title or the abstract                                                                                                                       | 1       |
|                              |         | (b) Provide in the abstract an informative and balanced summary of what was done and what was found                                                                                                          | 2       |
| <b>Introduction</b>          |         |                                                                                                                                                                                                              |         |
| Background/rationale         | 2       | Explain the scientific background and rationale for the investigation being reported                                                                                                                         | 3-4     |
| Objectives                   | 3       | State specific objectives, including any prespecified hypotheses                                                                                                                                             | 4       |
| <b>Methods</b>               |         |                                                                                                                                                                                                              |         |
| Study design                 | 4       | Present key elements of study design early in the paper                                                                                                                                                      | 4       |
| Setting                      | 5       | Describe the setting, locations, and relevant dates, including periods of recruitment, exposure, follow-up, and data collection                                                                              | 4       |
| Participants                 | 6       | (a) Give the eligibility criteria, and the sources and methods of selection of participants                                                                                                                  | 4       |
| Variables                    | 7       | Clearly define all outcomes, exposures, predictors, potential confounders, and effect modifiers. Give diagnostic criteria, if applicable                                                                     | 5-6     |
| Data sources/<br>measurement | 8*      | For each variable of interest, give sources of data and details of methods of assessment (measurement). Describe comparability of assessment methods if there is more than one group                         | 5-6     |
| Bias                         | 9       | Describe any efforts to address potential sources of bias                                                                                                                                                    | 5       |
| Study size                   | 10      | Explain how the study size was arrived at                                                                                                                                                                    | 6       |
| Quantitative variables       | 11      | Explain how quantitative variables were handled in the analyses. If applicable, describe which groupings were chosen and why                                                                                 | 5-6     |
| Statistical methods          | 12      | (a) Describe all statistical methods, including those used to control for confounding                                                                                                                        | 5-6     |
|                              |         | (b) Describe any methods used to examine subgroups and interactions                                                                                                                                          | 5-6     |
|                              |         | (c) Explain how missing data were addressed                                                                                                                                                                  | 5-6     |
|                              |         | (d) If applicable, describe analytical methods taking account of sampling strategy                                                                                                                           |         |
|                              |         | (e) Describe any sensitivity analyses                                                                                                                                                                        | 5-6     |
| <b>Results</b>               |         |                                                                                                                                                                                                              |         |
| Participants                 | 13*     | (a) Report numbers of individuals at each stage of study—eg numbers potentially eligible, examined for eligibility, confirmed eligible, included in the study, completing follow-up, and analysed            | 6       |
|                              |         | (b) Give reasons for non-participation at each stage                                                                                                                                                         | 16      |
|                              |         | (c) Consider use of a flow diagram                                                                                                                                                                           | 16      |
| Descriptive data             | 14*     | (a) Give characteristics of study participants (eg demographic, clinical, social) and information on exposures and potential confounders                                                                     | 6       |
|                              |         | (b) Indicate number of participants with missing data for each variable of interest                                                                                                                          | 16      |
| Outcome data                 | 15*     | Report numbers of outcome events or summary measures                                                                                                                                                         | 5       |
| Main results                 | 16      | (a) Give unadjusted estimates and, if applicable, confounder-adjusted estimates and their precision (eg, 95% confidence interval). Make clear which confounders were adjusted for and why they were included | 6-7     |

|                          |    |                                                                                                                                                                            |     |
|--------------------------|----|----------------------------------------------------------------------------------------------------------------------------------------------------------------------------|-----|
|                          |    | (b) Report category boundaries when continuous variables were categorized                                                                                                  | N/A |
|                          |    | (c) If relevant, consider translating estimates of relative risk into absolute risk for a meaningful time period                                                           | N/A |
| Other analyses           | 17 | Report other analyses done—eg analyses of subgroups and interactions, and sensitivity analyses                                                                             | N/A |
| <b>Discussion</b>        |    |                                                                                                                                                                            |     |
| Key results              | 18 | Summarise key results with reference to study objectives                                                                                                                   | 7-9 |
| Limitations              | 19 | Discuss limitations of the study, taking into account sources of potential bias or imprecision. Discuss both direction and magnitude of any potential bias                 | 10  |
| Interpretation           | 20 | Give a cautious overall interpretation of results considering objectives, limitations, multiplicity of analyses, results from similar studies, and other relevant evidence | 11  |
| Generalisability         | 21 | Discuss the generalisability (external validity) of the study results                                                                                                      | 11  |
| <b>Other information</b> |    |                                                                                                                                                                            |     |
| Funding                  | 22 | Give the source of funding and the role of the funders for the present study and, if applicable, for the original study on which the present article is based              | 1   |

\*Give information separately for exposed and unexposed groups.

**Note:** An Explanation and Elaboration article discusses each checklist item and gives methodological background and published examples of transparent reporting. The STROBE checklist is best used in conjunction with this article (freely available on the Web sites of PLoS Medicine at <http://www.plosmedicine.org/>, Annals of Internal Medicine at <http://www.annals.org/>, and Epidemiology at <http://www.epidem.com/>). Information on the STROBE Initiative is available at [www.strobe-statement.org](http://www.strobe-statement.org).

# BMJ Open

## State Level Variation in Opioid Prescribing after Knee Arthroscopy among the Opioid-Naïve in the United States: 2015-2019

|                                 |                                                                                                                                                         |
|---------------------------------|---------------------------------------------------------------------------------------------------------------------------------------------------------|
| Journal:                        | <i>BMJ Open</i>                                                                                                                                         |
| Manuscript ID                   | bmjopen-2019-035126.R1                                                                                                                                  |
| Article Type:                   | Original research                                                                                                                                       |
| Date Submitted by the Author:   | 05-Jun-2020                                                                                                                                             |
| Complete List of Authors:       | Ukert, Benjamin; Texas A&M University System<br>Huang, Yanlan<br>Sennett, Brian; University of Pennsylvania<br>Delgado, Kit; University of Pennsylvania |
| <b>Primary Subject Heading</b>: | Health services research                                                                                                                                |
| Secondary Subject Heading:      | Health services research, Health policy, Surgery                                                                                                        |
| Keywords:                       | Health policy < HEALTH SERVICES ADMINISTRATION & MANAGEMENT, Knee < ORTHOPAEDIC & TRAUMA SURGERY, PUBLIC HEALTH, PAIN MANAGEMENT                        |
|                                 |                                                                                                                                                         |

SCHOLARONE™  
Manuscripts



I, the Submitting Author has the right to grant and does grant on behalf of all authors of the Work (as defined in the below author licence), an exclusive licence and/or a non-exclusive licence for contributions from authors who are: i) UK Crown employees; ii) where BMJ has agreed a CC-BY licence shall apply, and/or iii) in accordance with the terms applicable for US Federal Government officers or employees acting as part of their official duties; on a worldwide, perpetual, irrevocable, royalty-free basis to BMJ Publishing Group Ltd ("BMJ") its licensees and where the relevant Journal is co-owned by BMJ to the co-owners of the Journal, to publish the Work in this journal and any other BMJ products and to exploit all rights, as set out in our [licence](#).

The Submitting Author accepts and understands that any supply made under these terms is made by BMJ to the Submitting Author unless you are acting as an employee on behalf of your employer or a postgraduate student of an affiliated institution which is paying any applicable article publishing charge ("APC") for Open Access articles. Where the Submitting Author wishes to make the Work available on an Open Access basis (and intends to pay the relevant APC), the terms of reuse of such Open Access shall be governed by a Creative Commons licence – details of these licences and which [Creative Commons](#) licence will apply to this Work are set out in our licence referred to above.

Other than as permitted in any relevant BMJ Author's Self Archiving Policies, I confirm this Work has not been accepted for publication elsewhere, is not being considered for publication elsewhere and does not duplicate material already published. I confirm all authors consent to publication of this Work and authorise the granting of this licence.

1  
2  
3  
4 **State Level Variation in Opioid Prescribing after Knee Arthroscopy among the Opioid-**  
5 **Naïve in the United States: 2015-2019**  
6  
7

8 **Corresponding Author:**

9 Benjamin Ukert, PhD 212 Adriance Lab Rd, 1266 TAMU, College Station, TX 77843. Email  
10 [bukert@tamu.edu](mailto:bukert@tamu.edu), phone 979-436-9056.  
11

12 **Authors:**

13 Benjamin Ukert<sup>1,2,4,5</sup>

14 Yanlan Huang, MS<sup>2,5</sup>

15 Brian Sennett, MD<sup>6</sup>

16 M. Kit Delgado, MD, MS<sup>2,3,4,5</sup>  
17  
18

- 19 1. Department of Health Policy and Management, School of Public Health, Texas A&M  
20 University,
- 21 2. Center for Emergency Care Policy and Research, Department of Emergency Medicine,  
22 Perelman School of Medicine, University of Pennsylvania
- 23 3. Department of Biostatistics, Epidemiology, and Informatics, Perelman School of  
24 Medicine, University of Pennsylvania
- 25 4. Penn Injury Science Center, University of Pennsylvania
- 26 5. Leonard Davis Institute of Health Economics, University of Pennsylvania
- 27 6. Division of Sports Medicine, Department of Orthopedics, University of Pennsylvania  
28

29 **Word Count:** 2,687  
30  
31  
32  
33  
34  
35  
36  
37  
38  
39  
40  
41  
42  
43  
44  
45  
46  
47  
48  
49  
50  
51  
52  
53  
54  
55  
56  
57  
58  
59  
60

**Objective** It has been established that most patients prescribed opioids after minor surgery have tablets left over, better understanding the variation in opioid prescribing and variation in dosage of the prescription could guide efforts to reduce prescribing. This study describes the state level variation in opioid prescribing after a knee arthroscopy among opioid naïve patients.

**Design** Retrospective cohort study.

**Setting:** Commercial insurance claims data.

**Participants:** 98,623 individual across the USA with commercial insurance who were opioid naïve and had a knee arthroscopy between 2015 and 2019.

**Exposure:** Patients who filled an opioid prescription within 3 days of a knee arthroscopy.

**Outcome measures:** Opioid prescriptions were measured as a pharmacy claim for filling an opioid within 3 days of a knee arthroscopy. We measured the patient and state level opioid prescribing rate, tablet count, morphine milligram equivalent dose per prescription, and risk-adjusted predicted opioid quantity.

**Results** Overall, 72% of patients filled an opioid prescription with a median tablet count of 40 and median morphine milligram equivalent of 250. Patients with an invasive procedure (27.9% vs 22.4%;  $p < 0.001$ ), higher education level ( $p < 0.001$ ), and fewer comorbidities (0.9 vs 1.2,  $p < 0.001$ ) had higher rates of opioid prescribing. The prescribing rate in the highest state, Nebraska (85%), was double the prescribing rate in the lowest state, South Dakota (40%). Comparing the case mix adjusted expected prescribing rate to the observed prescribing rate displayed that 18 states had observed prescribing rates that were higher than their expected prescribing rates.

**Conclusion** Wide variation in the likelihood of receiving a prescription, depending on state of residence, was observed. The dosages prescribed were high and have been associated with transition to long-term use. These findings suggest there is substantial opportunity for the development of guidelines to reduce variability in opioid prescribing for this common ambulatory procedure.

#### **Article Summary (Strengths and limitations of this study):**

- This is among the first studies to demonstrate the degree of state-level variation in opioid prescribing rates for a common minor surgical procedure. This provides a clearer view of the degree to which prescribing rates can be reduced given that surgical approaches and pain response is not expected to dramatically vary by state.
- Another strength is the adjustment for demographic and clinical characteristics to account for differences in case-mix across states.
- Our study is a claims-based study does not capture prescriptions that were made but not filled by patients or prescriptions that were paid out of pocket. Furthermore, the demographic and clinical characteristics we could assess are limited.

#### **Introduction**

1  
2  
3 Between 1999 and 2016 opioid prescribing quadrupled to over 259 million prescriptions  
4 per year. Opioid related deaths are the leading cause of unintentional death in the United  
5 States responsible for at least 47,000 fatalities in 2018.<sup>1</sup> For many procedures opioid analgesics  
6 have become the default standard of care for post-operative pain management and are the  
7 leading exposure of patients' to opioid prescriptions, particularly among the opioid-naïve, even  
8 after low-risk surgical procedures.<sup>2-5</sup> This can be problematic because a single prescription and  
9 higher dosage prescriptions have been associated with prolonged opioid use.<sup>6-14</sup> Furthermore,  
10 50-70% of opioid tablets prescribed are never taken posing the risk of misuse and diversion.<sup>15</sup>  
11  
12  
13  
14  
15  
16  
17  
18  
19

20 Surgical societies have called for more judicious opioid prescribing and have promoted  
21 the concept of "opioid stewardship" in post-operative pain.<sup>16-18</sup> As with longstanding efforts to  
22 promote antibiotic stewardship, the first step in establishing post-operative opioid stewardship  
23 initiatives is to establish baseline use, duration, and variation by procedure and indication.<sup>19</sup>  
24 Even though the national levels of prescribing are well documented, limited attention has been  
25 given to the regional variation in opioid prescribing for opioid naïve patients after common  
26 outpatient surgeries.<sup>4,20-22</sup> Orthopedic arthroscopic procedures account for 2 of the top 3 most  
27 common outpatient surgical procedures performed in the U.S., yet there is a dearth of literature  
28 benchmarking opioid prescribing rates and dosages for these procedures.<sup>23-25</sup> Knee arthroscopy  
29 is the most common outpatient orthopedic procedure in the U.S., with approximately 1 million  
30 procedures per year.<sup>26,27</sup> A new report from National Academies of Sciences, Engineering, and  
31 Medicine highlight knee arthroscopy as a priority indication for establishing evidence-based  
32 opioid prescribing guidelines.<sup>28</sup> Establishing the baseline variation in opioid prescribing after  
33 knee arthroscopy is a critical knowledge gap to fill to establish quality improvement targets.  
34 Prescribing targets are essential in reducing prescribing with a large potential public health  
35 impact given the volume of this procedure and current lack of consensus for this procedure on  
36 post-operative opioid use.  
37  
38  
39  
40  
41  
42  
43  
44  
45  
46  
47  
48  
49  
50  
51  
52  
53  
54  
55  
56  
57  
58  
59  
60

1  
2  
3 The goal of our study was to describe the patient and state level variation in post-  
4 operative opioid prescribing rates and dosages for opioid naïve patients after a knee  
5 arthroscopy in the United States (U.S.). Our investigation focused on the prescribing practices  
6 among the commercially insured, a relatively unexplored group of individuals in terms of opioid  
7 prescribing, but the one with the highest risk of opioid use and abuse.<sup>7</sup> We hypothesized that  
8 there would be substantial variation in the state and patient level prescribing rates and dosages,  
9 even after accounting for patient characteristics.  
10  
11  
12  
13  
14  
15  
16  
17  
18  
19

## 20 **Methods**

21 We used the Clinformatics Data Mart Database (OptumInsight) from January 2015  
22 through June 2019, which comprises commercial insurance claims from a large national U.S.  
23 private health insurer covering 7.5 million lives annually represented in every state. We defined  
24 an index knee arthroscopy encounter as the earliest visit in which a beneficiary had a knee  
25 arthroscopy provider medical claim.<sup>29</sup>  
26  
27  
28  
29  
30  
31

32 We focused our analysis on opioid-naïve patients and excluded any patients who filled  
33 an opioid prescription within the six months preceding the index surgery date. We also excluded  
34 patients who did not receive the knee arthroscopy in the outpatient hospital or ambulatory  
35 surgical center setting to retain a more homogenous sample. Patients who did not have medical  
36 claims for the surgery and the operational facility charge on the same day or the day after were  
37 also excluded to mitigate concerns regarding the day of the actual surgery. Lastly, we excluded  
38 patients who had multiple knee arthroscopy surgeries to reduce the confounding effect of  
39 reoperation on the probability that opioid prescriptions were associated with additional  
40 surgeries.  
41  
42  
43  
44  
45  
46  
47  
48  
49  
50

51 We collected patient demographic information on age, gender, education, household  
52 income, ethnicity, and the state where the surgery was performed. We identified the patients'  
53 Elixhauser comorbidities, as well as diagnosis codes for drug abuse, alcohol abuse, depression,  
54  
55  
56  
57  
58  
59  
60



1  
2  
3 and psychoses from any medical claims filed in the previous six months. We also used Current  
4 Procedural Technology (CPT) codes to classify knee arthroscopy procedures based on  
5 involvement of bone (invasive, such as anterior cruciate ligament repair) vs. soft tissue only  
6 (non-invasive, such as simple knee arthroscopy) (See Appendix for a description).  
7  
8  
9  
10

### 11 12 *No Patient and Public Involvement*

13  
14 This research was done without patient involvement. Patients were not invited to comment on  
15 the study design and were not consulted to develop patient relevant outcomes or interpret the  
16 results. Patients were not invited to contribute to the writing or editing of this document for  
17 readability or accuracy.  
18  
19  
20  
21  
22

### 23 24 *Definition of Opioid Prescription*

25  
26 We identified prescription claims based on the pharmacy claims and identified opioids  
27 according to National Drug Codes (excluding methadone and non-tablet formulations) filled  
28 within 3 days of the index visit. See Appendix for a description of included opioids. We excluded  
29 opioids primarily used for treatment of opioid use disorder. We attributed a filled prescription  
30 within 3 days of the surgery to the physician by extracting the encrypted NPI on the pharmacy  
31 claim. We also used the pharmacy claim to identify the drug name, strength, number of tablets,  
32 and days supplied. We calculate morphine milligram equivalents (MME) per tablet based on  
33 conversion factors available from the Center for Medicare & Medicaid Services, which were  
34 used to calculate the total MME per prescription.  
35  
36  
37  
38  
39  
40  
41  
42  
43  
44  
45  
46  
47

### 48 49 *Outcomes*

50  
51 The goal of the study was to describe the prescription rate, defined as the percent of  
52 opioid naïve patients who filled an opioid prescription within 3 days of the knee arthroscopy, and  
53 the regional variation of the prescription rate across the U.S. states. Secondary outcomes of  
54  
55  
56  
57  
58  
59  
60

1  
2  
3 interest were the average quantity (in tablets) per prescription, and the total Morphine Milligram  
4 Equivalent (MME) of the prescription. To assess the geographic variation, we aggregated all  
5 opioid outcomes to the state level, resulting in average outcomes for each state. We also  
6 analyzed the primary and secondary outcomes by procedure type (invasive vs. non-invasive).  
7  
8 Lastly, we utilized age, race, ethnicity, level of education, comorbidities, procedure, and state  
9 information to predict the probability of receiving an opioid prescription within 3 days using a  
10 logistic regression model to understand how observed vs. predicted prescribing patterns vary  
11 after adjusting for patient characteristics. We then follow previously established methods by  
12 Delgado et al. and estimated observed-to-expected state-level prescribing ratios with 95%  
13 confidence intervals, with values over 1 indicating patients in that state that were more likely to  
14 fill opioids than expected, and less than 1 indicating patients in states that were less likely to fill  
15 opioids than expected.<sup>14</sup>  
16  
17  
18  
19  
20  
21  
22  
23  
24  
25  
26  
27  
28  
29

## 30 Results

31  
32 During the study period 225,277 patients underwent knee arthroscopy. After exclusions,  
33 98,623 opioid naïve patients were available for the final analysis (Figure 1) with 26,011 patients  
34 undergoing an invasive arthroscopic procedure involving drilling or cutting of bone and 72,612  
35 patients who had a non-invasive arthroscopic procedure in which only soft tissue work was  
36 performed. Figure 1 displays that 72% of opioid naïve patients filled a prescription. The  
37 prescription rate was only slightly higher for invasive vs. non-invasive procedures (76% vs.  
38 71%). Compared to patients who did not fill an opioid prescription in Table 1, patients with an  
39 initial opioid prescription were more likely to be younger (46.7 years of age vs 52.3 years of age,  
40  $p<0.001$ ) and more predominately male (54.4% vs 53.0%,  $p<0.001$ ). Those who filled an opioid  
41 prescription were more likely to be higher educated (have a bachelor's degree or more 23.4%  
42 vs 21.6%,  $p\text{-value}<0.001$ ), were more likely to have household incomes above \$100,000 (41.3%  
43 vs 38.4%  $p<0.001$ ), were slightly more likely to be white (73.2% vs 71.9%  $p<0.001$ ), and were  
44  
45  
46  
47  
48  
49  
50  
51  
52  
53  
54  
55  
56  
57  
58  
59  
60

1  
2  
3 more likely to have an invasive procedure relative to a non-invasive procedure (27.9% vs  
4 22.4%,  $p < 0.001$ ). In terms of comorbidities, those who received an opioid prescription were  
5 more likely to have fewer comorbidities than those who did not receive an opioid (0.9 vs. 1.2  
6 Elixhauser Index score).  
7  
8  
9  
10

### 11 12 13 **Patient Level Variation in Dosages of Opioid Prescriptions**

14  
15 We observed wide variation in opioid prescribing in terms of the number of tablets, the  
16 day's supply, and total MME for the 72% of patients who filled a prescription within 3 days of the  
17 index surgery (Figure 2). The median prescription was for 40 tablets (IQR 30-50), 250 MME  
18 (150-375), with a median duration of 5 days (IQR 4-7) (Appendix Table 1). At the 90<sup>th</sup> percentile,  
19 a total of 4,789 patients filled a prescription with more than 60 tablets with a duration of at least  
20 13 days and an MME of more than 733 MME.  
21  
22  
23  
24  
25  
26  
27

28 Translating the dosage to MME per day suggests that the median patient received an  
29 average daily dosage of 50 MME, which is the same as the 50 MME level identified as  
30 increasing the risks for overdose death by the Center for Disease Control (CDC).<sup>30</sup> In terms of  
31 differences in prescribing by procedure type, invasive procedures resulted in a slightly higher  
32 average quantity, MME, and day's supply than non-invasive procedures, however, these  
33 findings are not-statistically different from each other (Appendix Table 1 and Appendix Figure 1).  
34  
35  
36  
37  
38  
39  
40  
41  
42

### 43 **State Level Variation in Opioid Prescribing Rates and Dosages**

44 We also observed wide variation in the state level in the proportion of patients who filled  
45 an opioid prescription within 3 days of the index date was also observed (Figure 3). The  
46 observed prescription fill rate ranged from 40 percent in South Dakota to 85 percent in  
47 Nebraska (see also Appendix Table 2). Figure 3 also highlights states that had statistically  
48 different observed prescribing rates either above (shown in red )or below the expected  
49 prescribing rate (blue) adjusted for case mix and covariates. Several states had observed  
50  
51  
52  
53  
54  
55  
56  
57  
58  
59  
60

1  
2  
3 prescribing rates well below the expected rate. North Dakota, South Dakota, Nevada, Kentucky,  
4  
5 and West Virginia, had prescribing rates that were between 20 to 40 percent lower than  
6  
7 expected based on patient characteristics. In contrast, Alabama, Rhode Island, Utah, and  
8  
9 Nebraska exhibited prescribing rates that were 10 percent higher than the expected rates.  
10  
11 Overall, 18 states had prescribing rates that were higher than expected based on patient case  
12  
13 mix (Appendix Figures 2-4). These results highlight significant variation in terms of prescribing  
14  
15 even after adjusting for patient characteristics.  
16  
17

18 While we found variation in observed to expected opioid prescription dosages at the  
19  
20 state level, it was less dramatic than the variation in the prescription rate. The median tablet  
21  
22 count for all states was 40 (IQR=36-42 tablets). Tablet count per prescription varied from 24.1  
23  
24 in Vermont to 44.9 in Oklahoma. The median state level MME was 277 MME (IQR = 245 MME  
25  
26 to 300 MME) per prescription and varied from 157 MME in Vermont to 371 MME in Oklahoma  
27  
28 (Appendix Table 2).  
29  
30  
31  
32

### 33 Discussion

34 In a U.S. sample of over 98,000 opioid naive commercially insured patients who  
35  
36 underwent an outpatient knee arthroscopy between 2015 and 2019, we found high rates of  
37  
38 opioid prescribing and large variation in patient and state level opioid prescribing rates, even  
39  
40 after adjusting for key patient characteristics. Over 72% of patients filled an opioid prescription  
41  
42 within 3 days of the surgery date, where the median patient received a 5-day supply, a median  
43  
44 tablet count of 40 tablets, and a dosage of 250 MME. There was twofold state level variation  
45  
46 prescribing between the highest prescribing rate (85% in Nebraska) compared to the state with  
47  
48 the lowest prescribing rate (40% in South Dakota), and this variation persisted even after  
49  
50 adjustment for patient characteristics.  
51  
52

53 The significant variation in prescribing rates and dosages indicates there could be ample  
54  
55 room to reduce variation in prescribing as we do not expect the pathophysiology of pain to be  
56  
57

1  
2  
3 markedly different across state lines for these common outpatient procedures. The observed  
4 dosage suggests that the median patient received an average daily dosage of 50 MME, which is  
5 equal to the 50 MME level identified as increasing the risks for overdose death by the Center for  
6 Disease Control.<sup>30</sup> Nevertheless, these prescribing levels may pose adverse health risks when  
7 alternative strategies may be equally effective for many patients.<sup>31,32</sup> Over 5 million MME could  
8 have been prevented from being distributed if the MME level would not have exceeded the  
9 median total MME dosage in each year (Appendix Table 3). A growing general consensus  
10 outlines that prescriptions should not be written for more than 50 MME per day and no more  
11 than 6 days (i.e. 300 MME).<sup>30</sup> Nevertheless, 36% of patients who filled a prescription received a  
12 dosage that is higher than the recommended threshold.  
13  
14

15  
16 Our results expand previous work by examining more broadly the prescribing patterns  
17 after minor surgeries among opioid naïve patients who are commercially insured. Using data  
18 from a national commercial insurer allowed us to investigate the prescribing rates among a  
19 younger population that has a documented higher risk of opioid dependence and misuse.<sup>7,33,34</sup>  
20 To date, the existing evidence has predominately focused on inpatient procedures among single  
21 institutions or has focused on specific groups such as the military population or the elderly.<sup>5,13,35</sup>  
22  
23

24  
25 In terms of the existing literature evaluating opioid prescribing after surgical procedures,  
26 our results imply similarly high rates of prescribing compared to those reported for inpatient  
27 procedures. Opioid prescribing after orthopedic surgery is very common and orthopedic surgery  
28 has one of the highest frequency of opioid claims among Medicare patients.<sup>3</sup> Our results mirror  
29 prior studies suggesting that post-operative opioids continue to be prescribed at high amounts  
30 independent of type of procedure and expected pain intensity and duration.<sup>5</sup> This is an  
31 opportunity for improvement given that excessive opioid prescribing among the opioid-naïve is  
32 associated with the risk of long-term opioid use<sup>22</sup> and left over tablets can be diverted and  
33 misused.<sup>33,36,37</sup>  
34  
35  
36  
37  
38  
39  
40  
41  
42  
43  
44  
45  
46  
47  
48  
49  
50  
51  
52  
53  
54  
55  
56  
57  
58  
59  
60

1  
2  
3 Our findings demonstrate that post-operative knee arthroscopy pain management relies  
4 heavily on opioids, while more conservative treatments may be sufficient, especially for less  
5 severe cases, though few guidelines exist.<sup>30,31</sup> The National Academies of the Sciences,  
6 Engineering, and Medicine highlighted knee arthroscopy as a high priority procedure that would  
7 benefit from evidence based guidelines for post-operative opioid prescribing.<sup>28</sup> Orthopedic  
8 specific opioid prescribing guidelines could have a significant impact on reducing excessive  
9 variation in prescribing and reducing risks of long term use and misuse.<sup>2,3</sup> Health systems could  
10 implement lower electronic default opioid dosage based on these guidelines. These strategy  
11 has been shown to reduce opioid prescribing while still preserving clinician autonomy.<sup>38,39</sup>

12  
13  
14  
15  
16  
17  
18  
19  
20  
21  
22 Future research should aim at understanding how many opioid tablets are actually  
23 needed to control pain after knee arthroscopy and to optimize and guide prescribing levels that  
24 minimize the opportunity for left over opioids and subsequent opioid diversion. Studies are also  
25 needed to identify whether there is a dosage threshold level that is associated with prolonged  
26 use and other long-term unintended health outcomes and consequences on overall patient-care  
27 needs.<sup>24,25</sup>

28  
29  
30  
31  
32  
33  
34  
35 From a policy research perspective it is critical to understand how differences in state  
36 opioid prescribing limits, policies on mandated Prescription Drug Monitoring Program (PDMP)  
37 use, guidelines, and culture contribute to the state-level variation in prescribing rates and  
38 dosages and associated downstream and local health outcomes. Insights gleaned from lower  
39 prescribing states could be applied to help reduce variation in higher prescribing states with the  
40 potential to safely reduce excessive prescribing.

#### 41 42 43 44 45 46 47 48 49 **Limitations**

50  
51 This study has several limitations. First, we were only able to measure filled prescriptions (not  
52 prescribed prescriptions) obtained within the population that generated an insurance bill, and  
53 cannot speak to the number of consumed tablets, or measure opioid prescriptions obtained  
54  
55  
56  
57  
58  
59  
60

1  
2  
3 through other channels. We potentially underestimated the prescribing rate, as unfilled  
4 prescriptions and filled prescription paid out of pocket were not captured. Second, unmeasured  
5 differences between patients, such as access to different provider networks, co-payments and  
6 coinsurance may have contributed to the observable variation in opioid prescribing. Third,  
7 limitations in data do not allow us to decisively attribute patients to physicians. Excluding  
8 patients without a knee arthroscopy and an opioid prescription within a 3-day window should  
9 improve patient-physician match. Fourth, we cannot make any statements regarding how state  
10 policies may have already reduced prescribing, such as prescribing guidelines, or how effective  
11 policies may be.<sup>40-42</sup> Lastly, our results are only generalizable to the general commercially  
12 insured opioid naïve population who received a knee arthroscopy.  
13  
14  
15  
16  
17  
18  
19  
20  
21  
22  
23  
24  
25

## 26 **Conclusions**

27  
28 Our findings using U.S. data from 2015-2019 suggest there is still wide patient and state  
29 level variation in post-operative opioid prescribing for opioid naïve patients undergoing knee  
30 arthroscopy. This suggests substantial opportunities to reduce practice variation with the  
31 development and implementation of knee arthroscopy specific opioid prescribing guidelines.  
32 Development of such guidelines is urgently needed because of the potential health  
33 consequences associated with the current dosages being prescribed.  
34  
35  
36  
37  
38  
39  
40  
41  
42

## 43 **Acknowledgements**

44  
45 **Competing Interests:** All authors declare no conflicts of interest.  
46

47 **Contributions:** BU and MKD conceived the study. YH acquired the data. BU and MKD  
48 conducted the analysis. MKD supervised the analysis. All authors (BU, YH,BS, and MKD)  
49 interpreted the results. BU and MKD drafted the manuscript. All authors (BU, YH,BS, and MKD)  
50 contributed to the critical revision of the manuscript. BU takes responsibility for the manuscript  
51 as a whole.  
52

53 **Funding:** "Research reported in this publication was supported by pilot grant funding from the  
54 National Institute On Drug Abuse (P30DA040500). Dr. Delgado was also supported by a  
55 contract from Food and Drug Administration (HHSF223201810209C), a grant from the National  
56  
57  
58  
59  
60

1  
2  
3 Institute of Child Health and Human Development (K23HD090272001), and The Abramson  
4 Family Foundation Fund for Acute Care and Injury Prevention Research." The content is solely  
5 the responsibility of the authors and does not necessarily represent the official views of the  
6 National Institutes of Health or the Food and Drug Administration.  
7

8  
9 **Data Availability Statement:** Data is not available due to data sharing restrictions. Data can be  
10 purchased from Optum (please visit the website for more information:  
11 <https://www.optum.com/solutions/data-analytics.html>). Statistical code available upon request.  
12  
13  
14  
15  
16  
17  
18  
19  
20  
21  
22  
23  
24  
25  
26  
27  
28  
29  
30  
31  
32  
33  
34  
35  
36  
37  
38  
39  
40  
41  
42  
43  
44  
45  
46  
47  
48  
49  
50  
51  
52  
53  
54  
55  
56  
57  
58  
59  
60

For peer review only



## REFERENCES

1. National Institute on Drug Abuse. <https://www.drugabuse.gov/related-topics/trends-statistics/overdose-death-rates>. Accessed May 29, 2020.
2. Ringwalt, C., Gugelmann, H., Garrettson, M., Dasgupta, N., Chung, A.E., Proescholdbell, S.K. and Skinner, A.C., 2014. Differential prescribing of opioid analgesics according to physician specialty for Medicaid patients with chronic noncancer pain diagnoses. *Pain Research and Management*, 19(4), pp.179-185.
3. Chen, J.H., Humphreys, K., Shah, N.H. and Lembke, A., 2016. Distribution of opioids by different types of medicare prescribers. *JAMA internal medicine*, 176(2), pp.259-261.
4. Levy, B., Paulozzi, L., Mack, K.A. and Jones, C.M., 2015. Trends in opioid analgesic-prescribing rates by specialty, US, 2007–2012. *American journal of preventive medicine*, 49(3), pp.409-413.
5. Scully, R.E., Schoenfeld, A.J., Jiang, W., Lipsitz, S., Chaudhary, M.A., Learn, P.A., Koehlmoos, T., Haider, A.H. and Nguyen, L.L., 2018. Defining optimal length of opioid pain medication prescription after common surgical procedures. *JAMA surgery*, 153(1), pp.37-43.
6. Shah A. Characteristics of Initial Prescription Episodes and Likelihood of Long-Term Opioid Use—United States, 2006–2015. *MMWR. Morbidity and Mortality Weekly Report*. 2017;66.
7. Edlund MJ, Martin BC, Russo JE, Devries A, Braden JB, Sullivan MD. The role of opioid prescription in incident opioid abuse and dependence among individuals with chronic non-cancer pain: the role of opioid prescription. *Clinical journal of Pain*. 2014;30(7):557.
8. Barnett, M.L., Olenski, A.R. and Jena, A.B., 2017. Opioid-prescribing patterns of emergency physicians and risk of long-term use. *New England journal of medicine*, 376(7), pp.663-673.
9. Deyo RA, Hallvik SE, Hildebran C, et al. Association between initial opioid prescribing patterns and subsequent long-term use among opioid-naïve patients: A statewide retrospective cohort study. *Journal of General Internal Medicine*. 2017;32(1):21-27.
10. Rozet, I., Nishio, I., Robbertze, R., Rotter, D., Chansky, H. and Hernandez, A.V., 2014. Prolonged opioid use after knee arthroscopy in military veterans. *Anesthesia & Analgesia*, 119(2), pp.454-459.
11. Jeffery MM, Hooten WM, Hess EP, et al. Opioid Prescribing for Opioid-Naive Patients in Emergency Departments and Other Settings: Characteristics of Prescriptions and Association With Long-Term Use. *Annals of Emergency Medicine*. 2017 (e-pub ahead of print)
12. Soneji, N., Clarke, H.A., Ko, D.T. and Wijeyesundera, D.N., 2016. Risks of developing persistent opioid use after major surgery. *JAMA surgery*, 151(11), pp.1083-1084.
13. Jiang, X., Orton, M., Feng, R., Hossain, E., Malhotra, N.R., Zager, E.L. and Liu, R., 2017. Chronic opioid usage in surgical patients in a large academic center. *Annals of surgery*, 265(4), p.722.

14. Delgado, M.K., Huang, Y., Meisel, Z., Hennessy, S., Yokell, M., Polsky, D. and Perrone, J., 2018. National Variation in Opioid Prescribing and Risk of Prolonged Use for Opioid-Naive Patients Treated in the Emergency Department for Ankle Sprains. *Annals of emergency medicine*.
15. Bicket, M.C., Long, J.J., Pronovost, P.J., Alexander, G.C. and Wu, C.L., 2017. Prescription opioid analgesics commonly unused after surgery: a systematic review. *JAMA surgery*, 152(11), pp.1066-1071.
16. American College of Surgeons Bulletin, August 2017, Volume 102, Number 8.
17. Varley, P.R. and Zuckerbraun, B.S., 2018. Opioid Stewardship and the Surgeon. *JAMA surgery*, 153(2), pp.e174875-e174875.
18. Trasolini, N.A., McKnight, B.M. and Dorr, L.D., 2018. The Opioid Crisis and the Orthopedic Surgeon. *The Journal of arthroplasty*, 33(11), pp.3379-3382.
19. Gauthier, T.P., Lantz, E., Heyliger, A., Francis, S.M. and Smith, L., 2014. Internet-based institutional antimicrobial stewardship program resources in leading US academic medical centers. *Clinical infectious diseases*, 58(3), pp.445-446.
20. Curtis, L.H., Stoddard, J., Radeva, J.I., Hutchison, S., Dans, P.E., Wright, A., Woosley, R.L. and Schulman, K.A., 2006. Geographic variation in the prescription of schedule II opioid analgesics among outpatients in the United States. *Health services research*, 41(3p1), pp.837-855.
21. McDonald, D.C., Carlson, K. and Izrael, D., 2012. Geographic variation in opioid prescribing in the US. *The journal of Pain*, 13(10), pp.988-996
22. Sun, E.C., Darnall, B.D., Baker, L.C. and Mackey, S., 2016. Incidence of and risk factors for chronic opioid use among opioid-naive patients in the postoperative period. *JAMA internal medicine*, 176(9), pp.1286-1293.
23. Alam, A., Gomes, T., Zheng, H., Mamdani, M.M., Juurlink, D.N. and Bell, C.M., 2012. Long-term analgesic use after low-risk surgery: a retrospective cohort study. *Archives of internal medicine*, 172(5), pp.425-430.
24. Clarke H, Soneji N, Ko DT, Yun L, Wijeyesundera DN. Rates and risk factors for prolonged opioid use after major surgery: population based cohort study. *BMJ*. 2014;348:g1251.
25. Brummett, C.M., Waljee, J.F., Goesling, J., Moser, S., Lin, P., Englesbe, M.J., Bohnert, A.S., Kheterpal, S. and Nallamothu, B.K., 2017. New persistent opioid use after minor and major surgical procedures in US adults. *JAMA surgery*, 152(6), pp.e170504-e170504.
26. Steiner, C.A., Karaca, Z., Moore, B.J., Imshaug, M.C. and Pickens, G., 2017. Surgeries in Hospital-Based Ambulatory Surgery and Hospital Inpatient Settings, 2014: Statistical Brief# 223.

- 1  
2  
3 27. Kim, S., Bosque, J., Meehan, J.P., Jamali, A. and Marder, R., 2011. Increase in outpatient  
4 knee arthroscopy in the United States: a comparison of National Surveys of Ambulatory  
5 Surgery, 1996 and 2006. *JBJS*, 93(11), pp.994-1000.  
6  
7 28. National Academies of Sciences, Engineering, and Medicine. Framing Opioid Prescribing  
8 Guidelines for Acute Pain: Developing the Evidence. National Academies Press; 2020 Feb  
9 20.  
10  
11 29. Optum.com. Clinformatics Data Mart. Available at:  
12 [https://www.optum.com/content/dam/optum/resources/productSheets/Clinformatics\\_for\\_Data\\_Mart.pdf](https://www.optum.com/content/dam/optum/resources/productSheets/Clinformatics_for_Data_Mart.pdf). Accessed November 28, 2018.  
13  
14  
15 30. Centers for Disease Control and Prevention, 2017. Calculating total daily dose of opioids for  
16 safer dosage. Available at: (Accessed January 17, 2018) [https://www.cdc.gov/drugoverdose/pdf/calculating\\_total\\_daily\\_dose-a.pdf](https://www.cdc.gov/drugoverdose/pdf/calculating_total_daily_dose-a.pdf) View in Article| Google Scholar.  
17  
18  
19 31. Chou, R., Gordon, D.B., de Leon-Casasola, O.A., Rosenberg, J.M., Bickler, S., Brennan, T.,  
20 Carter, T., Cassidy, C.L., Chittenden, E.H., Degenhardt, E. and Griffith, S., 2016.  
21 Management of Postoperative Pain: a clinical practice guideline from the American pain  
22 society, the American Society of Regional Anesthesia and Pain Medicine, and the American  
23 Society of Anesthesiologists' committee on regional anesthesia, executive committee, and  
24 administrative council. *The Journal of Pain*, 17(2), pp.131-157.  
25  
26 32. Hegmann, K.T., Weiss, M.S., Bowden, K., Branco, F., DuBrueler, K., Els, C., Mandel, S.,  
27 McKinney, D.W., Miguel, R., Mueller, K.L. and Nadig, R.J., 2014. ACOEM practice  
28 guidelines: opioids for treatment of acute, subacute, chronic, and postoperative  
29 pain. *Journal of occupational and environmental medicine*, 56(12), pp.e143-e159.  
30  
31 33. Hall AJ, Logan JE, Toblin RL, et al. Patterns of abuse among unintentional pharmaceutical  
32 overdose fatalities. *JAMA*. 2008;300(22):2613-2620.  
33  
34 34. Edlund MJ, Steffick D, Hudson T, Harris KM, Sullivan M. Risk factors for clinically  
35 recognized opioid abuse and dependence among veterans using opioids for chronic non-  
36 cancer pain. *Pain*. 2007;129(3):355-362.  
37  
38 35. Hill, M.V., McMahon, M.L., Stucke, R.S. and Barth, R.J., 2017. Wide variation and excessive  
39 dosage of opioid prescriptions for common general surgical procedures. *Annals of*  
40 *surgery*, 265(4), pp.709-714.  
41  
42 36. Bicket MC, Long JJ, Pronovost PJ, Alexander GC, Wu CL. Prescription opioid analgesics  
43 commonly unused after surgery: A systematic review. *Jama Surgery*. 2017;152(11):1066-  
44 1071.  
45  
46 37. Maughan BC, Hersh EV, Shofer FS, et al. Unused opioid analgesics and drug disposal  
47 following outpatient dental surgery: a randomized controlled trial. *Drug and Alcohol*  
48 *Dependence*. 2016;168:328-334.  
49  
50 38. Delgado MK, Shofer, FS, Patel, MS, Halpern SD, Edwards, C, Meisel, ZF, Perrone, J.  
51 Association between Electronic Medical Record Implementation of Default Opioid  
52 Prescription Quantities on Prescribing Behavior in Two Emergency Departments. *Journal of*  
53 *General Internal Medicine*. 2018 (in press).  
54  
55  
56  
57  
58  
59  
60

- 1  
2  
3  
4 39. Chiu AS, Jean RA, Hoag JR, Freedman-Weiss M, Healy JM, Pei KY. Association of lowering  
5 default pill counts in electronic medical record systems with postoperative opioid prescribing.  
6 JAMA surgery. 2018 Jul 18.  
7
- 8 40. Weiner SG, Baker O, Poon SJ, Rodgers AF, Garner C, Nelson LS, Schuur JD. The effect of  
9 opioid prescribing guidelines on prescriptions by emergency physicians in Ohio. Annals of  
10 emergency medicine. 2017 Dec 1;70(6):799-808.  
11
- 12 41. Jones CM, Logan J, Gladden RM, Bohm MK. Vital signs: demographic and substance use  
13 trends among heroin users—United States, 2002–2013. MMWR. Morbidity and mortality  
14 weekly report. 2015 Jul 10;64(26):719.  
15
- 16 42. Guy JG, Zhang K, Bohm MK, Losby J, Lewis B, Young R, Murphy LB, Dowell D. Vital signs:  
17 changes in opioid prescribing in the United States, 2006-2015. MMWR. Morbidity and  
18 mortality weekly report. 2017 Jul;66(26):697-704.  
19  
20  
21  
22  
23  
24  
25  
26  
27  
28  
29  
30  
31  
32  
33  
34  
35  
36  
37  
38  
39  
40  
41  
42  
43  
44  
45  
46  
47  
48  
49  
50  
51  
52  
53  
54  
55  
56  
57  
58  
59  
60

### Figure 1 – Flowchart of Sample

Notes: Figure 1 displays the flowchart from the full sample that leads to our final sample after sample exclusion restrictions

### Figure 2 – Details on the Prescriptions Filled within 3 Days of the Index Date

Notes: Figure 2 displays the distribution of the opioid fill for members who filled an opioid within 3 days of the index date for the quantity, MME, and days supply.

### Figure 3 – Observed to Expected Opioid Prescribing Rate

Notes: State-level variation in the opioid prescribing rate for knee arthroscopies among patients who were opioid naïve. The median state-level prescribing rate during these years was 72%. The observed prescribed rate is displayed within each state. States with higher-than-expected prescribing rates based on covariates are highlighted in red and those with lower-than-expected prescribing rates are shown in blue. Expected prescribing rate was adjusted for case mix with age, sex, procedure type, race, ethnicity, education, household income, comorbidities, and year, using multivariate logistic regression.

**Table 1 – Patient Characteristics Stratified by Filled Prescription within 3 Days of Surgery**

| Patient Characteristics   | Opioid Naïve  | Opioid Naïve and Opioid Prescription | <i>P</i> |
|---------------------------|---------------|--------------------------------------|----------|
|                           | (n = 27,433)  | (n=71,190)                           |          |
| <b>Age (Mean, SD)</b>     | 52.28 (18.82) | 46.71 (17.77)                        | <0.001   |
| <b>Gender</b>             |               |                                      |          |
| Male                      | 12894 (47.0%) | 32445 (45.6%)                        | <0.001   |
| Female                    | 14537 (53.0%) | 38741 (54.4%)                        |          |
| Unknown                   | 2 ( 0.0%)     | 4 ( 0.0%)                            |          |
| <b>Education level</b>    |               |                                      | <0.001   |
| No High School Degree     | 46 ( 0.2%)    | 120 (0.2%)                           |          |
| High School Degree        | 5208 (19.0%)  | 12934 (18.2%)                        |          |
| Some College              | 14011 (51.1%) | 36685 (51.5%)                        |          |
| Bachelor's Degree or More | 5915 (21.6%)  | 16680 (23.4%)                        |          |
| Unknown                   | 87 (0.3%)     | 223 (0.3%)                           |          |
| <b>Procedure Type</b>     |               |                                      |          |
| Invasive                  | 6135 (22.4%)  | 19876 (27.9%)                        | <0.001   |
| <b>HH Income</b>          |               |                                      | <0.001   |
| Less than 40k HH Income   | 2699 (9.8%)   | 6536 (9.2%)                          |          |
| 40-49k HH Income          | 1077 (3.9%)   | 2766 (3.9%)                          |          |
| 50-59k HH Income          | 1367 (5.0%)   | 3186 (4.5%)                          |          |
| 60-74k HH Income          | 2155 (7.9%)   | 5104 (7.2%)                          |          |
| 75-99k HH Income          | 3874 (14.1%)  | 9487(13.3%)                          |          |
| 100k and More             | 10528 (38.4%) | 29415 (41.3%)                        |          |

|                                           |               |               |        |
|-------------------------------------------|---------------|---------------|--------|
| Unknown                                   | 2166 (13.0%)  | 4548 (14.3%)  |        |
| <b><u>Ethnicity</u></b>                   |               |               | <0.001 |
| Asian                                     | 559 (2.0%)    | 1738 (2.4%)   |        |
| Black                                     | 1650 (6.0%)   | 4303 (6.0%)   |        |
| Hispanic                                  | 2306 (8.4%)   | 5797 (8.1%)   |        |
| White                                     | 19714 (71.9%) | 52106 (73.2%) |        |
| Unknown                                   | 3204 (11.7%)  | 7246 (10.2%)  |        |
| <b><u>Comorbidity</u></b>                 |               |               |        |
| Mean No. of Elixhauser Comorbidities (SD) | 1.20 (1.59)   | 0.91 (1.35)   | <0.001 |
| Hypertension (%)                          | 8708 (31.7%)  | 17165 (24.1%) | <0.001 |
| Chronic pulmonary disease (%)             | 161 (0.6%)    | 278 (0.4%)    | <0.001 |
| Depression (%)                            | 2181 (8.0%)   | 5268 (7.4%)   | 0.003  |
| Diabetes (%)                              | 1199 (4.4%)   | 2285 (3.2%)   | <0.001 |
| Psychoses (%)                             | 65 (0.2%)     | 117 (0.2%)    | 0.009  |
| Alcohol abuse (%)                         | 187 (0.7%)    | 436 (0.6%)    | 0.888  |
| Drug abuse (%)                            | 207 (0.8%)    | 300 (0.4%)    | <0.001 |
| Median No. Tablets (IQR)                  | -             | 40 (30 - 50)  |        |
| Days supplied, median (IQR)               | -             | 5 (4 - 7)     |        |
| MME/prescription, median (IQR)            | -             | 250 (150-375) |        |

Figure 1 – Flowchart of Sample

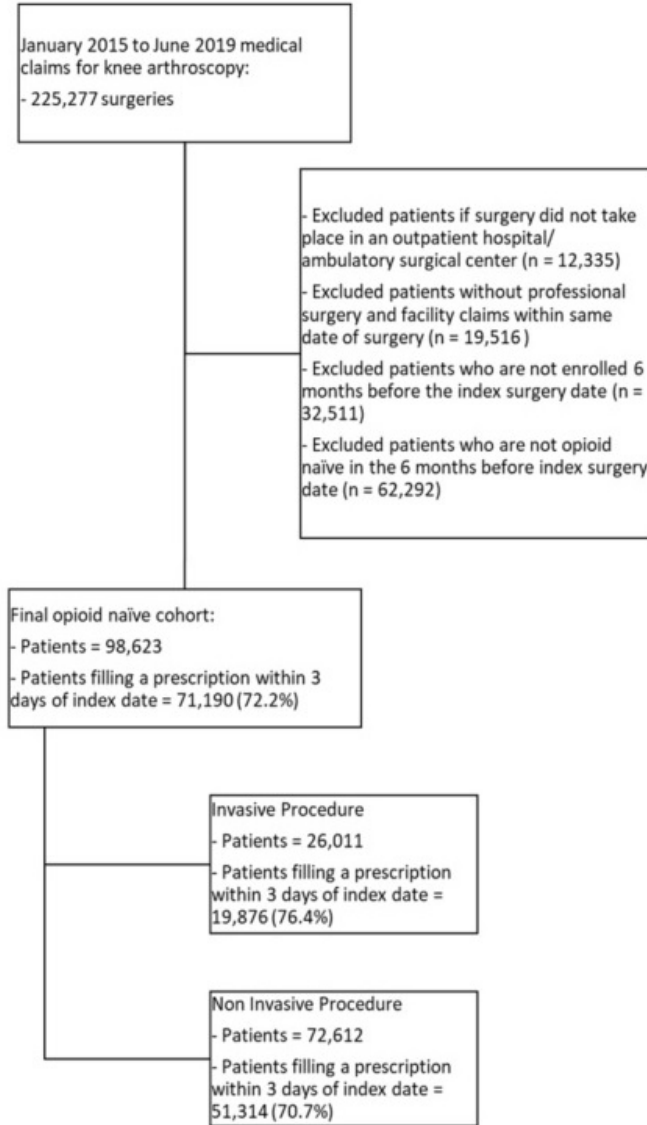

Figure 1

79x135mm (144 x 144 DPI)

1  
2  
3  
4  
5  
6  
7  
8  
9  
10  
11  
12  
13  
14  
15  
16  
17  
18  
19  
20  
21  
22  
23  
24  
25  
26  
27  
28  
29  
30  
31  
32  
33  
34  
35  
36  
37  
38  
39  
40  
41  
42  
43  
44  
45  
46  
47  
48  
49  
50  
51  
52  
53  
54  
55  
56  
57  
58  
59  
60

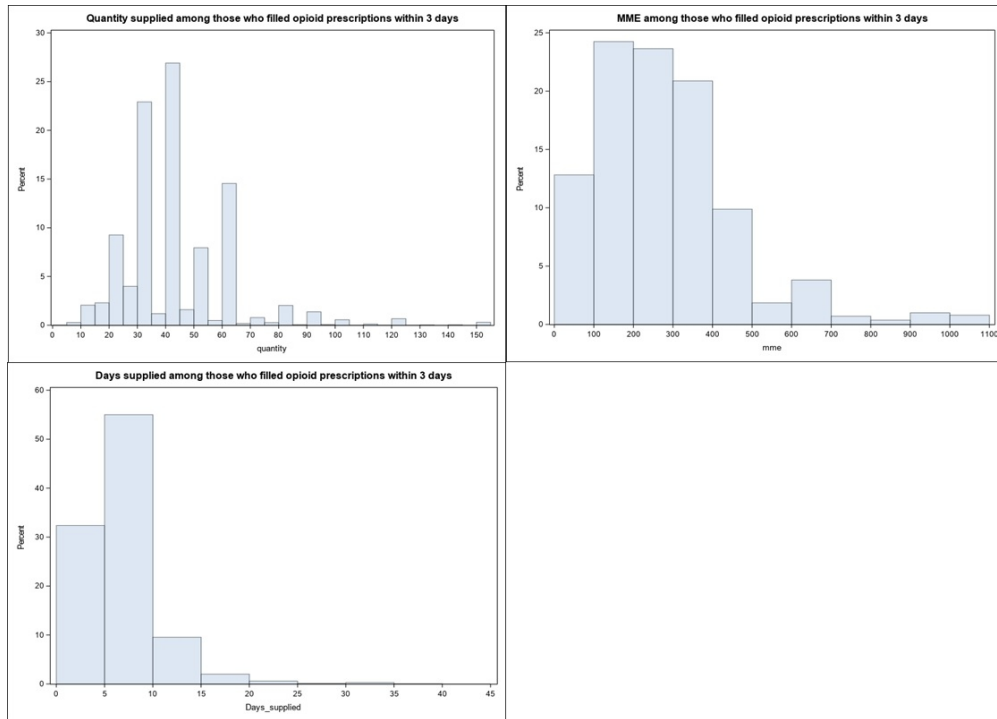

Figure 1

197x141mm (144 x 144 DPI)



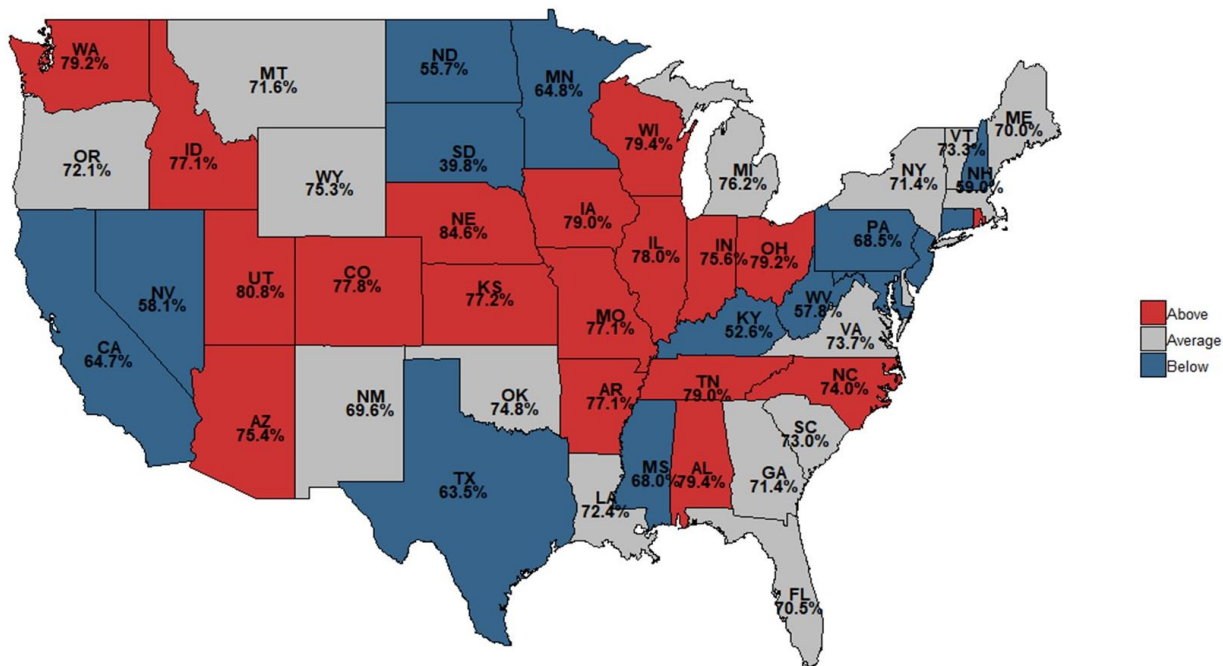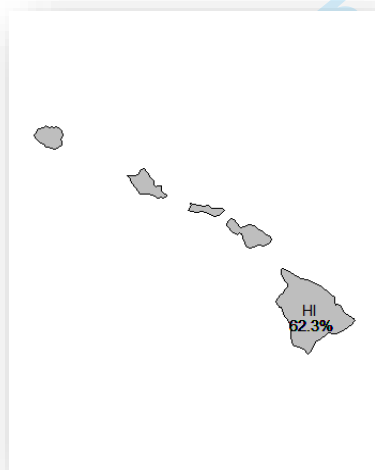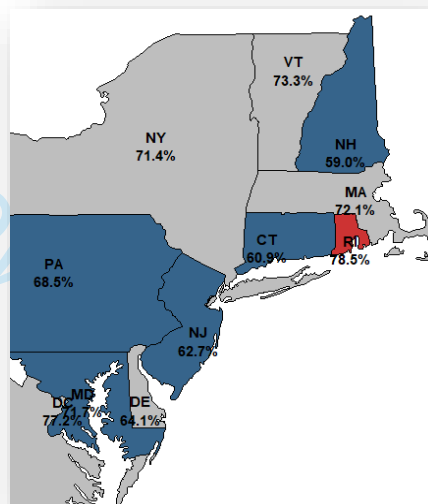

**APPENDIX**

*Definition of new Arthroscopy by CPT code:*

Arthroscopic procedures with significant bony work or expected increased pain (i.e. total synovectomy) involved: 29876, 29885, 29886, 29887, 29888, 29889

Arthroscopic procedures that do not involve significant bony work:

29870, 29871, 29873, 29874, 29875, 29877, 29879, 29880, 29881, 29882, 29883, 29884

*Opioid classes identified in pharmacy claims and included:* Codeine, Dihydrocodeine, Fentanyl, Hydrocodone, Hydromorphone, Meperidine, Morphine, Oxycodone, Oxymorphone, Tapentadol, Tramadol

**Appendix Table 1 – Opioid Prescribing Information for filled Prescription within 3 days of Surgery Date (N=63,439)**

| <b>Quantity</b>    | <b>Mean</b> | <b>Min</b> | <b>10%</b> | <b>Median</b>        | <b>90%</b> | <b>95%</b> | <b>Max</b> |
|--------------------|-------------|------------|------------|----------------------|------------|------------|------------|
| Total              | 41.79       | 1          | 10         | 40<br>(IQR 30-50)    | 60         | 80         | 1298       |
| Non-Invasive       | 42.96       | 1          | 10         | 40<br>(IQR 30-45)    | 60         | 60         | 1000       |
| Invasive           | 52.16       | 1          | 12         | 40<br>(IQR 30-60)    | 70         | 90         | 1298       |
| <b>MME</b>         | <b>Mean</b> | <b>Min</b> | <b>10%</b> | <b>Median</b>        | <b>90%</b> | <b>95%</b> | <b>Max</b> |
| Total              | 292.47      | 7.5        | 60         | 250<br>(IQR 150-375) | 465        | 600        | 9734       |
| Non-Invasive       | 264.47      | 7.5        | 50         | 225<br>(IQR 150-450) | 450        | 600        | 7500       |
| Invasive           | 363.88      | 7.5        | 75         | 300<br>(IQR 225-450) | 600        | 750        | 9734       |
| <b>Days Supply</b> | <b>Mean</b> | <b>Min</b> | <b>10%</b> | <b>Median</b>        | <b>90%</b> | <b>95%</b> | <b>Max</b> |
| Total              | 6.03        | 1          | 2          | 5<br>(IQR 4-7)       | 10         | 12         | 120        |
| Non-Invasive       | 5.74        | 1          | 2          | 5<br>(IQR 4-7)       | 10         | 10         | 120        |
| Invasive           | 6.76        | 1          | 2          | 6<br>(IQR 5-8)       | 10         | 14         | 90         |

Notes: Mean opioid prescribing information for quantity, MME, and days supply are displayed for those members who filled an opioid within 3 days. Information on the minimum, medium, maximum, and the 10, 90, and 95 percentile are also reported.

**Appendix Table 2 – Average Observed Prescribing Rates, Quantity, and MME by State**

| State          | Prescribing |         |        |
|----------------|-------------|---------|--------|
|                | Rate        | Tablets | MME    |
| Alaska         | 0.42        | 49.09   | 447.73 |
| Alabama        | 0.79        | 37.00   | 298.37 |
| Arkansas       | 0.77        | 39.48   | 316.19 |
| Arizona        | 0.75        | 38.49   | 265.74 |
| California     | 0.65        | 40.34   | 302.36 |
| Colorado       | 0.78        | 38.10   | 263.56 |
| Connecticut    | 0.61        | 28.71   | 200.65 |
| D.C.           | 0.77        | 44.54   | 335.89 |
| Delaware       | 0.64        | 37.64   | 241.81 |
| Florida        | 0.71        | 39.19   | 275.07 |
| Georgia        | 0.71        | 39.03   | 293.63 |
| Hawaii         | 0.62        | 33.85   | 216.76 |
| Iowa           | 0.79        | 42.20   | 289.02 |
| Idaho          | 0.77        | 43.32   | 360.37 |
| Illinois       | 0.78        | 41.56   | 273.43 |
| Indiana        | 0.76        | 43.38   | 288.30 |
| Kansas         | 0.77        | 43.18   | 301.81 |
| Kentucky       | 0.53        | 42.50   | 334.85 |
| Louisiana      | 0.72        | 39.45   | 333.97 |
| Massachusetts  | 0.72        | 35.10   | 243.07 |
| Maryland       | 0.72        | 36.45   | 251.97 |
| Maine          | 0.70        | 34.04   | 239.30 |
| Michigan       | 0.76        | 42.97   | 290.01 |
| Minnesota      | 0.65        | 35.51   | 225.56 |
| Missouri       | 0.77        | 43.45   | 282.13 |
| Mississippi    | 0.68        | 36.94   | 297.58 |
| Montana        | 0.72        | 40.17   | 277.99 |
| North Carolina | 0.74        | 40.83   | 286.43 |
| North Dakota   | 0.56        | 34.22   | 243.85 |
| Nebraska       | 0.85        | 41.62   | 274.06 |
| New Hampshire  | 0.59        | 28.68   | 189.35 |
| New Jersey     | 0.63        | 33.54   | 244.84 |
| New Mexico     | 0.70        | 35.70   | 236.55 |
| Nevada         | 0.58        | 41.53   | 328.32 |
| New York       | 0.71        | 36.88   | 256.48 |
| Ohio           | 0.79        | 41.66   | 274.22 |
| Oklahoma       | 0.75        | 44.87   | 370.50 |
| Oregon         | 0.72        | 39.47   | 271.92 |
| Pennsylvania   | 0.68        | 35.69   | 234.77 |
| Rhode Island   | 0.79        | 29.59   | 201.37 |

|                |      |       |        |
|----------------|------|-------|--------|
| South Carolina | 0.73 | 41.60 | 310.22 |
| South Dakota   | 0.40 | 40.96 | 247.53 |
| Tennessee      | 0.79 | 36.32 | 282.58 |
| Texas          | 0.64 | 44.66 | 322.67 |
| Utah           | 0.73 | 43.80 | 323.29 |
| Virginia       | 0.81 | 37.10 | 291.04 |
| Vermont        | 0.74 | 41.53 | 292.94 |
| Washington     | 0.73 | 24.13 | 156.88 |
| Wisconsin      | 0.79 | 39.77 | 277.17 |
| West Virginia  | 0.79 | 39.08 | 245.44 |
| Wyoming        | 0.58 | 38.28 | 242.95 |

**Appendix Table 3 –Total MME Saved if Dosage Would not Have Exceeded the Median Total MME Level**

| <b>Year</b>                  | <b>Median MME</b> | <b>Patients</b> | <b>Total MME Saved</b> |
|------------------------------|-------------------|-----------------|------------------------|
| 2015                         | 300               | 5,572           | 1,303,848              |
| 2016                         | 300               | 5,713           | 1,319,703              |
| 2017                         | 300               | 5,474           | 1,187,858              |
| 2018                         | 210               | 7,950           | 993,750                |
| 2019<br>(first two quarters) | 180               | 3,886           | 423,574                |
| All                          | 250               | 28,595          | 5,230,577              |

1  
2  
3  
4  
5  
6  
7  
8  
9  
10  
11  
12  
13  
14  
15  
16  
17  
18  
19  
20  
21  
22  
23  
24  
25  
26  
27  
28  
29  
30  
31  
32  
33  
34  
35  
36  
37  
38  
39  
40  
41  
42  
43  
44  
45  
46  
47

**Appendix Figure 1 – Distribution on the Filled Prescriptions within 3 Days of the Index Date by Invasive vs. Non-invasive Procedure**

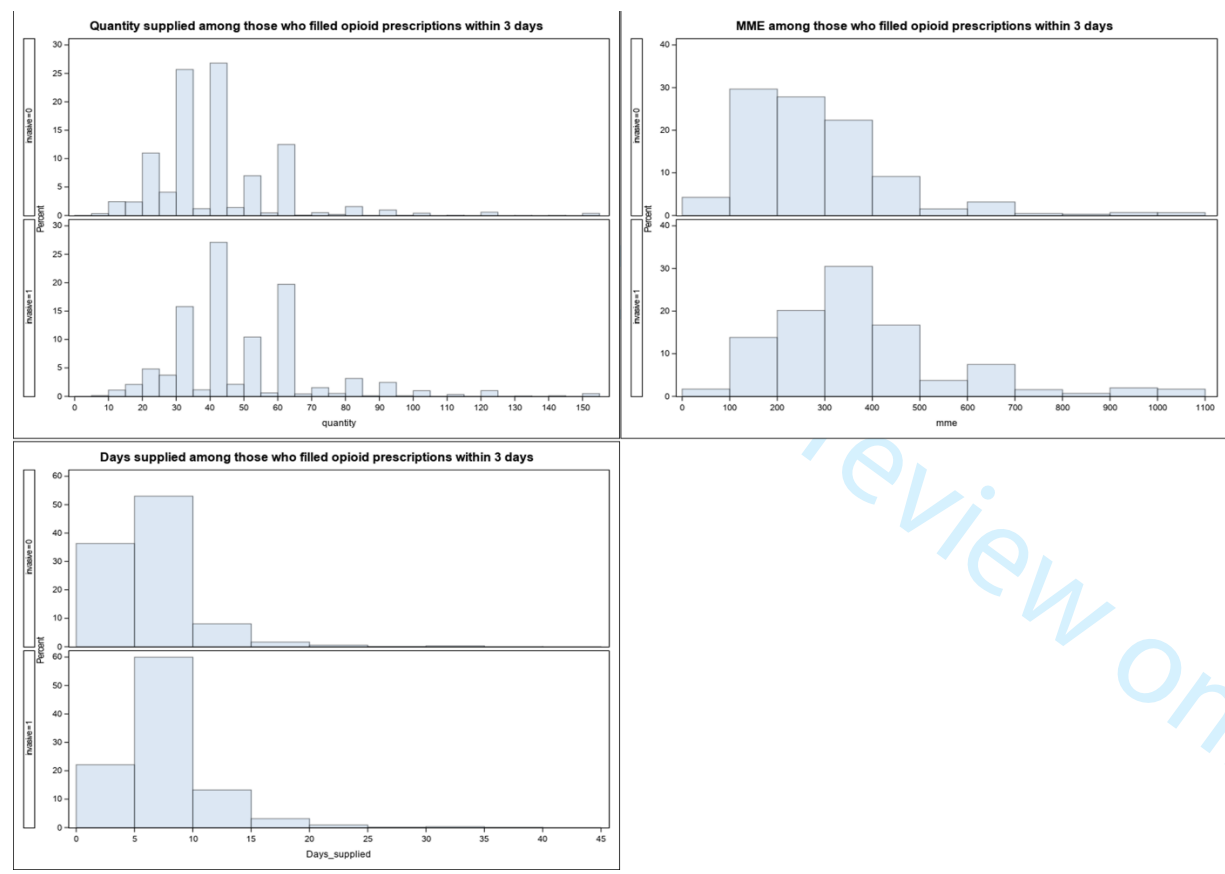

Review only

Appendix Figure 2 – Observed to Expected Opioid Prescribing Rate by State

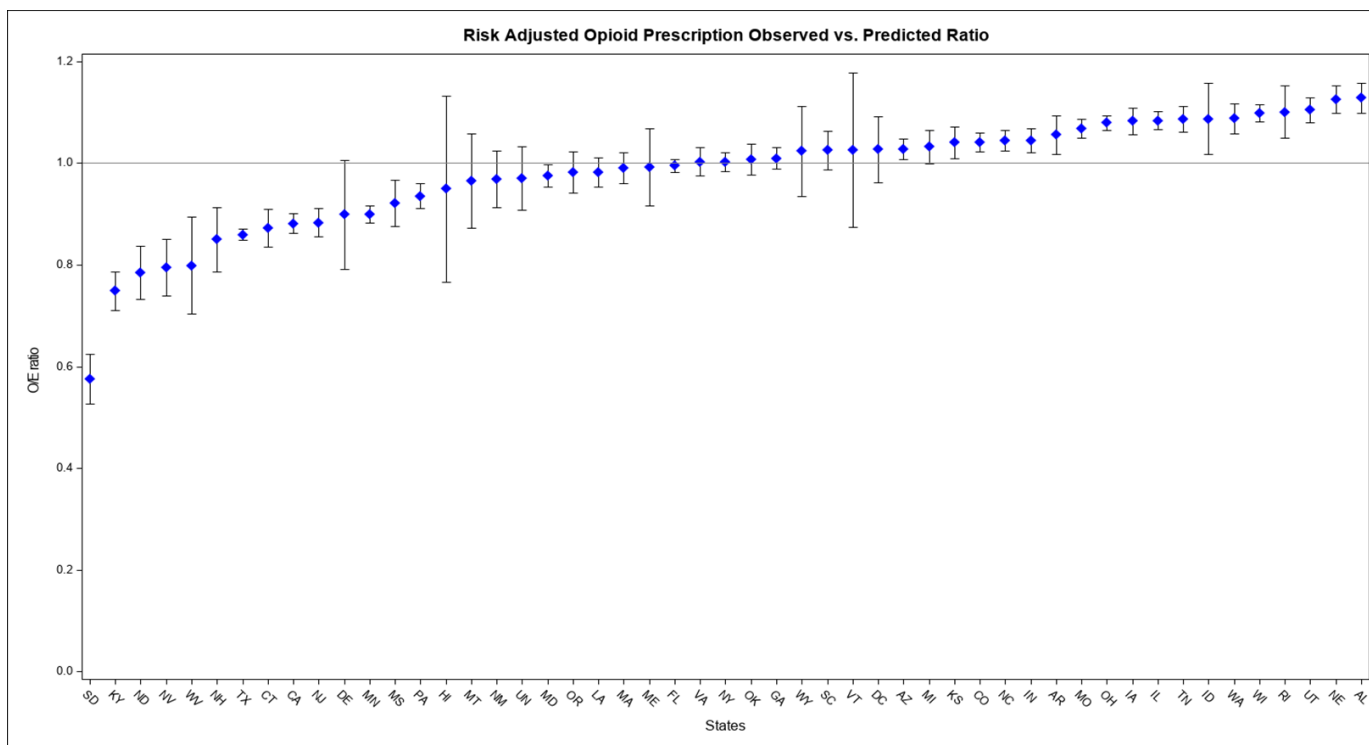

Notes: State-level variation in the opioid prescribing rate for knee arthroscopies among patients who were opioid naive. The median state-level prescribing rate during these years was 73%. The observed to expected prescribed rate is displayed for each state with a 95% confidence interval. States with higher-than-expected prescribing rates are displayed with an O/E rate larger than 1. Expected prescribing rate was adjusted for case mix with age, sex, procedure type, race, ethnicity, education, household income, comorbidities, and year, using multivariate logistic regression.

Appendix Figure 3 – Observed to Expected Opioid MME per Encounter by State

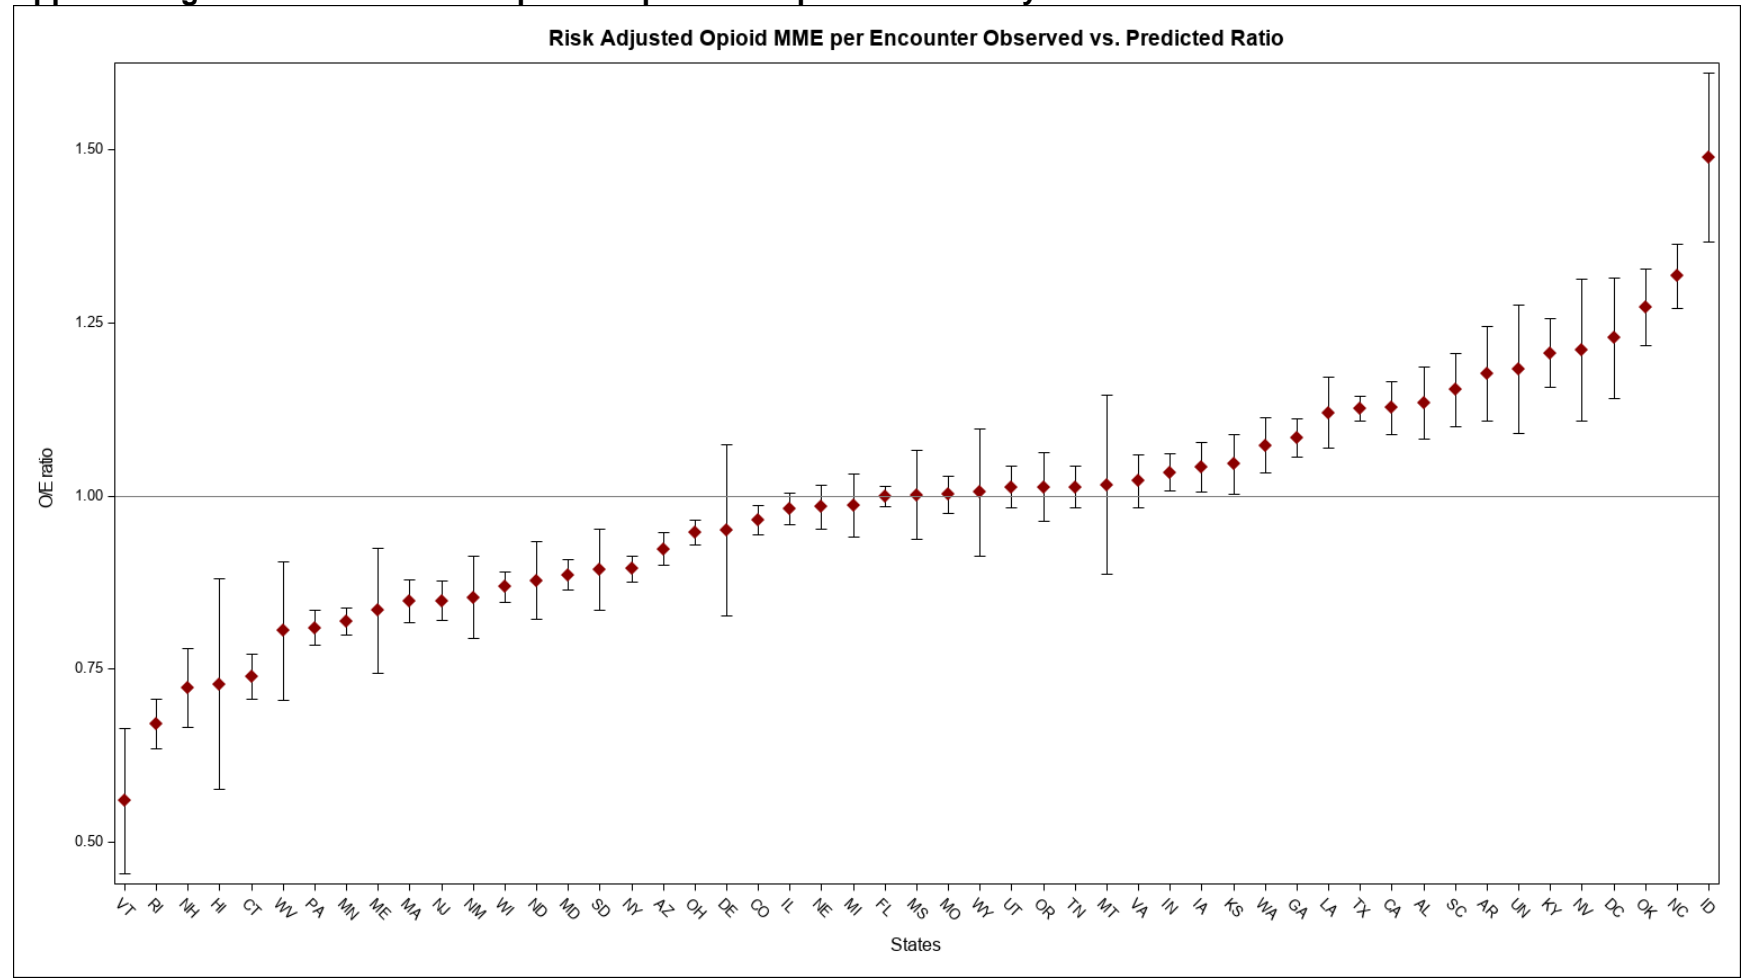

Notes: State-level variation in the opioid prescribing rate for knee arthroscopies among patients who were opioid naive. The observed to expected prescribed rate is displayed for each state with a 95% confidence interval. States with higher-than-expected prescribing rates are displayed with an O/E rate larger than 1. Expected prescribing rate was adjusted for case mix with age, sex, procedure type, race, ethnicity, education, household income, comorbidities, and year, using multivariate linear regression.



Appendix Figure 4 – Observed to Expected Opioid MME per Prescription by State

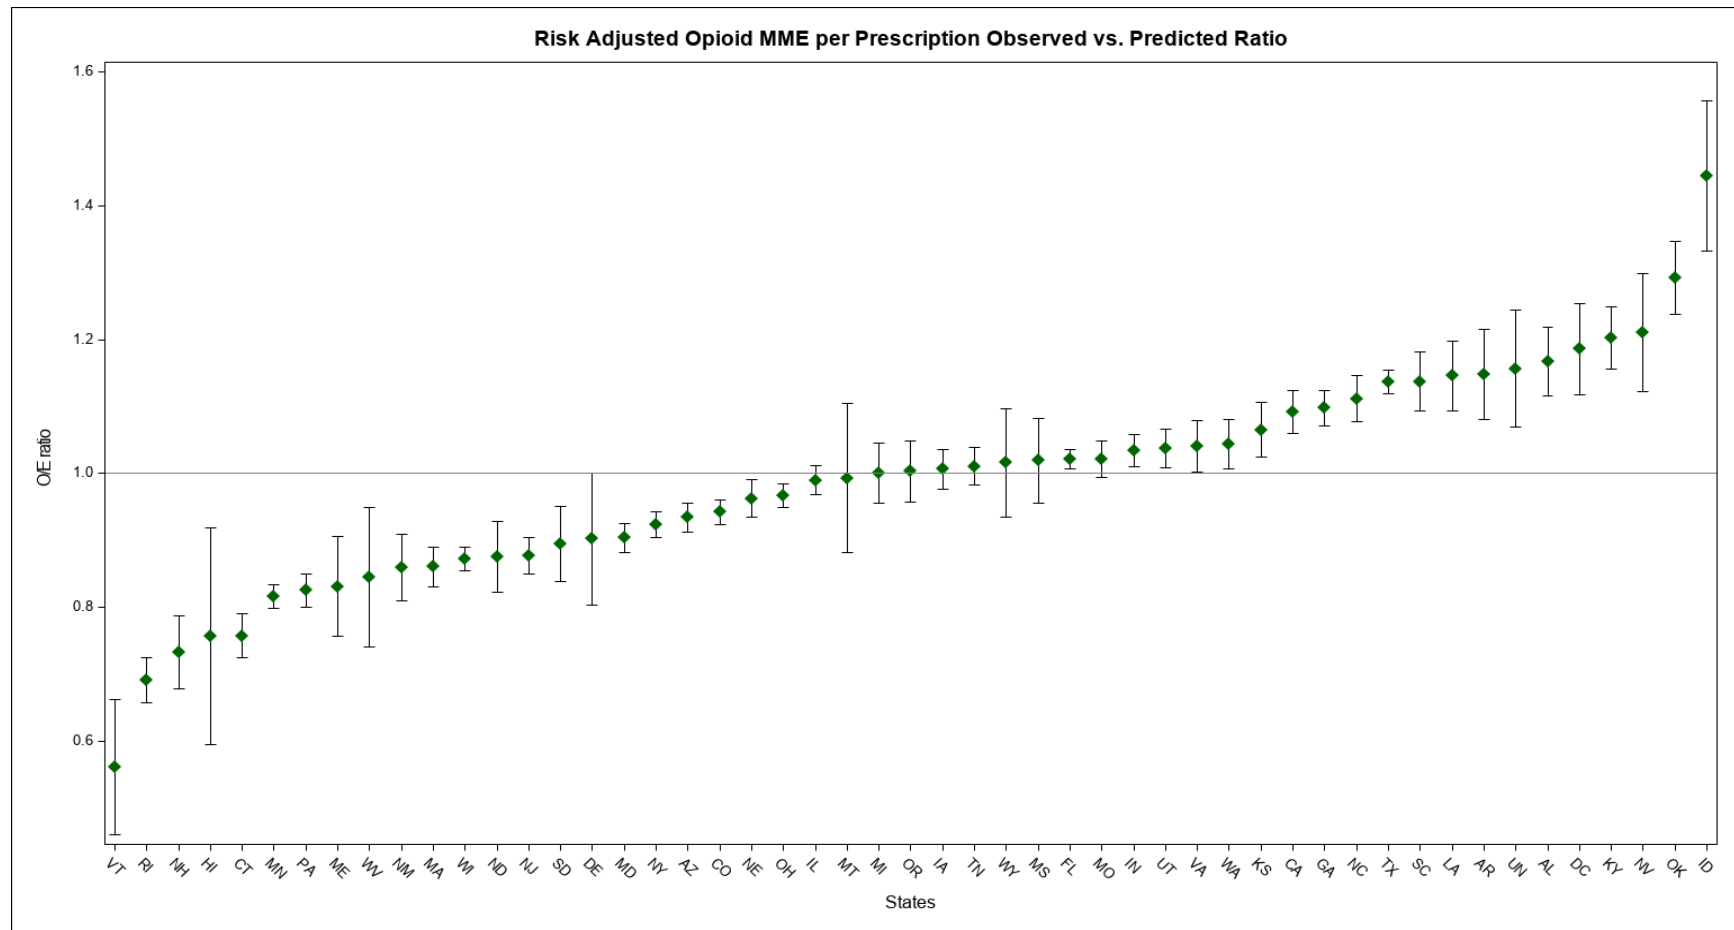

Notes: State-level variation in the opioid prescribing rate for knee arthroscopies among patients who were opioid naive. The observed to expected prescribed rate is displayed for each state with a 95% confidence interval. States with higher-than-expected prescribing rates are displayed with an O/E rate larger than 1. Expected prescribing rate was adjusted for case mix with age, sex, procedure type, race, ethnicity, education, household income, comorbidities, and year, using multivariate linear regression.

STROBE Statement—Checklist of items that should be included in reports of *cross-sectional studies*

|                              | Item No | Recommendation                                                                                                                                                                                               | Page No |
|------------------------------|---------|--------------------------------------------------------------------------------------------------------------------------------------------------------------------------------------------------------------|---------|
| <b>Title and abstract</b>    | 1       | (a) Indicate the study's design with a commonly used term in the title or the abstract                                                                                                                       | 1       |
|                              |         | (b) Provide in the abstract an informative and balanced summary of what was done and what was found                                                                                                          | 2       |
| <b>Introduction</b>          |         |                                                                                                                                                                                                              |         |
| Background/rationale         | 2       | Explain the scientific background and rationale for the investigation being reported                                                                                                                         | 3-4     |
| Objectives                   | 3       | State specific objectives, including any prespecified hypotheses                                                                                                                                             | 4       |
| <b>Methods</b>               |         |                                                                                                                                                                                                              |         |
| Study design                 | 4       | Present key elements of study design early in the paper                                                                                                                                                      | 4       |
| Setting                      | 5       | Describe the setting, locations, and relevant dates, including periods of recruitment, exposure, follow-up, and data collection                                                                              | 4       |
| Participants                 | 6       | (a) Give the eligibility criteria, and the sources and methods of selection of participants                                                                                                                  | 4       |
| Variables                    | 7       | Clearly define all outcomes, exposures, predictors, potential confounders, and effect modifiers. Give diagnostic criteria, if applicable                                                                     | 5-6     |
| Data sources/<br>measurement | 8*      | For each variable of interest, give sources of data and details of methods of assessment (measurement). Describe comparability of assessment methods if there is more than one group                         | 5-6     |
| Bias                         | 9       | Describe any efforts to address potential sources of bias                                                                                                                                                    | 5       |
| Study size                   | 10      | Explain how the study size was arrived at                                                                                                                                                                    | 6       |
| Quantitative variables       | 11      | Explain how quantitative variables were handled in the analyses. If applicable, describe which groupings were chosen and why                                                                                 | 5-6     |
| Statistical methods          | 12      | (a) Describe all statistical methods, including those used to control for confounding                                                                                                                        | 5-6     |
|                              |         | (b) Describe any methods used to examine subgroups and interactions                                                                                                                                          | 5-6     |
|                              |         | (c) Explain how missing data were addressed                                                                                                                                                                  | 5-6     |
|                              |         | (d) If applicable, describe analytical methods taking account of sampling strategy                                                                                                                           |         |
|                              |         | (e) Describe any sensitivity analyses                                                                                                                                                                        | 5-6     |
| <b>Results</b>               |         |                                                                                                                                                                                                              |         |
| Participants                 | 13*     | (a) Report numbers of individuals at each stage of study—eg numbers potentially eligible, examined for eligibility, confirmed eligible, included in the study, completing follow-up, and analysed            | 6       |
|                              |         | (b) Give reasons for non-participation at each stage                                                                                                                                                         | 16      |
|                              |         | (c) Consider use of a flow diagram                                                                                                                                                                           | 16      |
| Descriptive data             | 14*     | (a) Give characteristics of study participants (eg demographic, clinical, social) and information on exposures and potential confounders                                                                     | 6       |
|                              |         | (b) Indicate number of participants with missing data for each variable of interest                                                                                                                          | 16      |
| Outcome data                 | 15*     | Report numbers of outcome events or summary measures                                                                                                                                                         | 5       |
| Main results                 | 16      | (a) Give unadjusted estimates and, if applicable, confounder-adjusted estimates and their precision (eg, 95% confidence interval). Make clear which confounders were adjusted for and why they were included | 6-7     |

|                          |    |                                                                                                                                                                            |     |
|--------------------------|----|----------------------------------------------------------------------------------------------------------------------------------------------------------------------------|-----|
|                          |    | (b) Report category boundaries when continuous variables were categorized                                                                                                  | N/A |
|                          |    | (c) If relevant, consider translating estimates of relative risk into absolute risk for a meaningful time period                                                           | N/A |
| Other analyses           | 17 | Report other analyses done—eg analyses of subgroups and interactions, and sensitivity analyses                                                                             | N/A |
| <b>Discussion</b>        |    |                                                                                                                                                                            |     |
| Key results              | 18 | Summarise key results with reference to study objectives                                                                                                                   | 7-9 |
| Limitations              | 19 | Discuss limitations of the study, taking into account sources of potential bias or imprecision. Discuss both direction and magnitude of any potential bias                 | 10  |
| Interpretation           | 20 | Give a cautious overall interpretation of results considering objectives, limitations, multiplicity of analyses, results from similar studies, and other relevant evidence | 11  |
| Generalisability         | 21 | Discuss the generalisability (external validity) of the study results                                                                                                      | 11  |
| <b>Other information</b> |    |                                                                                                                                                                            |     |
| Funding                  | 22 | Give the source of funding and the role of the funders for the present study and, if applicable, for the original study on which the present article is based              | 1   |

\*Give information separately for exposed and unexposed groups.

**Note:** An Explanation and Elaboration article discusses each checklist item and gives methodological background and published examples of transparent reporting. The STROBE checklist is best used in conjunction with this article (freely available on the Web sites of PLoS Medicine at <http://www.plosmedicine.org/>, Annals of Internal Medicine at <http://www.annals.org/>, and Epidemiology at <http://www.epidem.com/>). Information on the STROBE Initiative is available at [www.strobe-statement.org](http://www.strobe-statement.org).
